1 **Structural variation, functional differentiation and**  
2 **expression characteristics of the AP2/ERF gene family and**  
3 **its response to cold stress and methyl jasmonate in *Panax***  
4 ***ginseng* C.A. Meyer**

5 **Short title: Structural and functional Analysis of AP2/ERF**  
6 **gene family in *Panax ginseng* C.A. Meyer**

7 Jing Chen<sup>1,2</sup>✉, Yuanhang Zhou<sup>1</sup>✉, Qi Zhang<sup>1</sup>, Li Li<sup>1</sup>, Chunyu Sun<sup>1,2</sup>, Kangyu Wang<sup>1,2</sup>,  
8 Yanfang Wang<sup>2,3</sup>, Mingzhu Zhao<sup>1,2</sup>, Hongjie Li<sup>1</sup>, Yilai Han<sup>1</sup>, Ping Chen<sup>1</sup>, Ruiqi Li<sup>1</sup>,  
9 Jun Lei<sup>1</sup>, Meiping Zhang<sup>1,2\*</sup>, and Yi Wang<sup>1,2\*</sup>

10 <sup>1</sup> College of Life Science, Jilin Agricultural University, 2888 Xincheng Street,  
11 Changchun, Jilin 130118, China.

12 <sup>2</sup> Research Center for Ginseng Genetic Resources Development and Utilization,  
13 2888 Xincheng Street, Changchun, Jilin 130118, China.

14 <sup>3</sup> College of Chinese Medicinal Materials, Jilin Agricultural University, 2888  
15 Xincheng Street, Changchun 130118, Jilin, China.

16

17 ✉These authors contributed equally to this work.

18 Correspondence should be addressed to [meiping.zhang@jlau.edu.cn](mailto:meiping.zhang@jlau.edu.cn) and

19 [wanglaoshi0606@163.com](mailto:wanglaoshi0606@163.com)

20 **Abstract:**

21 The APETALA2/Ethylene Responsive Factor (AP2/ERF) gene family has been shown to play a  
22 crucial role in plant growth and development, stress responses and secondary metabolite biosynthesis.  
23 Nevertheless, little is known about the gene family in ginseng (*Panax ginseng*), an important traditional  
24 medicinal herb in Asia and North America. Here, we report the systematic analysis of the gene family  
25 present in ginseng using several transcriptomic databases. A total of 189 putative *AP2/ERF* genes,  
26 defined as *PgERF001* through *PgERF189*. The 93 *PgERF* genes that have the complete AP2 domain in  
27 their open reading frames were classified into five subfamilies, DREB, ERF, AP2, RAV and Soloist.  
28 The DREB subfamily and ERF subfamily were further clustered four and six groups, respectively,  
29 compared to the 12 groups of these subfamilies found in Arabidopsis. Gene ontology categorized these  
30 397 transcripts of the 189 *PgERF* genes into eight functional subcategories, suggesting their functional  
31 differentiation and they have been especially enriched for the nucleic acid binding transcription factor  
32 activity subcategory. The expression activity and networks of the 397 *PgERF* transcripts have  
33 substantially diversified across tissues, developmental stages and genotypes. Then, the expression  
34 change of six *PgERF* genes randomly selected from DREB subfamily, i.e., *PgERF073*, *PgERF079*,  
35 *PgERF110*, *PgERF115*, *PgERF120* and *PgERF128* responding to cold stress suggesting that DREB  
36 subfamily genes played an important role in cold resistance of ginseng. Finally, we studied the  
37 responses of the *PgERF* genes to methyl jasmonate (MeJA). 288 (72.5%) of the 397 *PgERF* gene  
38 transcripts responded to the MeJA treatment, with 136 up-regulated and 152 down-regulated, indicating  
39 that most members of the *PgERF* gene family are responsive to MeJA. These results provide resources  
40 and knowledge necessary for family-wide functional analysis of the *PgERF* genes in ginseng and  
41 related species.

42 **Keywords:** Gene family, APETALA2/Ethylene Responsive Factor (AP2/ERF) genes, *Panax ginseng*,  
43 Phylogeny, Functional Differentiation, Co-expression network, cold stress, Methyl Jasmonate (MeJA)

## 44 **1. Introduction**

45 Plants are subjected to numerous biotic and abiotic stresses all time through their growth and  
46 development. Therefore, they have developed a variety of mechanisms by producing secondary  
47 signaling molecules (e.g., ethylene and jasmonic acid) and response networks at the molecular,  
48 biochemical and physiological levels to perceive the external signals from and response to the stresses  
49 [1]. It has been documented that a large number of genes are involved in these processes [2]. Therefore,  
50 it is important to decipher the regulatory mechanisms of the defense-related genes involved in the signal  
51 transduction pathways and the plant responses to these stresses for enhanced and efficient plant genetic  
52 improvement [3]. The APETALA2/Ethylene Responsive Factor (AP2/ERF) transcription factors have  
53 been demonstrated to be one of the most important gene families actively functioning in plant response  
54 to biotic and abiotic stresses by binding to cis-acting elements of downstream target genes [4].

55 The AP2/ERF family has one or two conserved APETALA2 (AP2) domains (approximately 60 -  
56 70 amino acids) [5]. Based on the number and amino acid sequence similarities of the AP2 domains, the  
57 AP2/ERF family is divided into the DREB (dehydration responsive element binding), ERF, AP2, RAV  
58 (Related to ABI3/VP1) and Soloist subfamilies [6],[7]. Both DREB and ERF subfamilies possess a  
59 single AP2 domain, with a specific WLG motif, and could be further subdivided into A1 to A6 and B1  
60 to B6 groups, respectively [6]. Alternatively, the DREB and ERF subfamilies were also categorized into  
61 I to X, and VI-L and Xb-L groups, respectively [7]. The AP2 subfamily has two tandemly repeated AP2  
62 domains, while the RAV subfamily has one AP2 domain and one B3 domain that are commonly found  
63 in other transcription factors [8]. The Soloist subfamily also has only one AP2 domain. It was classified  
64 into an independent subfamily due to its relatively low sequence homology with the DREB and ERF  
65 subfamilies [9]. Although the AP2 domain of the AP2/ERF family is highly conserved, its five

66 subfamilies, DREB, ERF, AP2, RAV and Soloist, recognize different DNA cis-acting elements and  
67 exhibit substantial functional diversity [10]. Specifically, the members of the AP2 subfamily bind to the  
68 GCAC(A/G)N(A/T)TCCC(A/G)ANG(C/T) element and regulate developmental processes of different  
69 plant tissues, e.g., embryo, flower, sepal and fruit [11],[12],[13]. The *RAV1* gene of the RAV subfamily  
70 was reported to bind to CAACA and CACCTG motifs in *Arabidopsis thaliana* [14]. The roles of the  
71 RAV subfamily in plant development and various biotic and abiotic stresses were investigated in  
72 several plant species [15],[16],[17]. The only gene of the Soloist subfamily in *Arabidopsis*, *APDI*  
73 (*At4g13040*), worked as a positive regulator of disease defense by up-regulating the accumulation of  
74 salicylic acid (SA) [18]. The members of the ERF subfamily typically bind to the cis-acting element  
75 GCC-box and are involved in the signaling pathways of plant hormone, e.g., ethylene (ET), SA,  
76 jasmonic acid (JA) and abscisic acid (ABA), which play an important role in both plant growth and  
77 development and response to stresses [19],[20],[21]. On the other hand, the DREB subfamily recognizes  
78 the conserved CCGAC motif of the dehydration-responsive element present in stress-responsive genes  
79 and is associated with the response of plants to abiotic stresses [22],[23],[24].

80 The AP2/ERF family has been well characterized in the model plants, *A. thaliana* [6],[7] and  
81 *Medicago truncatula* [25], several crops, such as rice [7], maize [26], soybean [27], Chinese cabbage  
82 [10] and grapevine [28], and *Populus trichocarpa* [29]. However, little is known about the AP2/ERF  
83 family in the medicinal herb, *Panax ginseng* (ginseng). *Ginseng* is a perennial of the *Araliaceae* family  
84 and has long been cultivated for human medicine in Asia, particularly in China, Korea, and Japan.  
85 Ginseng, known as the “king of all herbs” in China, is mainly cultivated in Jilin Province; therefore, it is  
86 often known as Jilin ginseng. Ginseng has been widely used as a medicinal herb due to its bioactive  
87 components, especially ginsenosides that have been shown to play significant roles in anti-inflammation

88 [30],[31], antitumor [32], and immunomodulation [33]. However, ginseng has been suffering from  
89 various biotic and abiotic stresses, which is greatly threatening the ginseng production. Therefore,  
90 identification, characterization and utilization of the defense-related genes in ginseng are of significance  
91 for ginseng breeding and production. In the present study, we comprehensively studied the AP2/ERF  
92 family present in Jilin ginseng in several aspects, including gene identification, protein motif  
93 characterization, functional categorization and phylogenetic analysis. Moreover, the expression  
94 activities and patterns of AP2/ERF genes were also investigated at different developmental stages, in  
95 different tissues, different cultivars, under cold stress and under the methyl jasmonate (MeJA)  
96 treatment. The results of these studies have laid the foundation for deeply functional analysis and  
97 utilization of the genes of the AP2/ERF family and provided vital information on the molecular  
98 mechanism of plant response to biotic and abiotic stresses in ginseng and related plant species.

## 99 **2. Materials and methods**

### 100 **2.1 Databases**

101 We previously established a comprehensive transcriptome for Jilin ginseng from 14 tissues (fiber  
102 root, leg root, main root epiderm, main root cortex, rhizome, arm root, stem, leaf peduncle, leaflet  
103 pedicel, leaf blade, fruit peduncle, fruit pedicel, fruit flesh, and seed), from which 248,993 transcript  
104 unigenes (130,557 gene IDs) were assembled [34]. Moreover, we also sequenced and established the  
105 databases for the transcriptomes of the roots of 5-, 12-, 18- and 25-year-old plants [34] and the roots of  
106 four-year-old plants of 42 genotypes (named from S1 to S42) representing the diversity of Jilin ginseng  
107 [35]. In this study, a ginseng line IR826 genome sequence database [36] and another Ginseng Genome  
108 Database (<http://ginsengdb.snu.ac.kr/index.php>) reported by Kim *et al.* [37] were also used. In addition,

109 a transcriptome database of the adventitious roots of ginseng cv. Cheongsun treated with 200  $\mu$ M MeJA  
110 for 0, 12, 24 and 48 h, respectively [38] was also consulted.

## 111 **2.2 Identification of *PgERF* genes in ginseng**

112 To identify the genes of the AP2/ERF family in ginseng, the Hidden Markov Model (HMM)  
113 profile of the AP2/ERF domain (Pfam: PF00847) and the protein sequences of the AP2/ERF genes  
114 downloaded from NCBI (<http://blast.ncbi.nlm.nih.gov/Blast>) were used to query the 248,993 Jilin  
115 ginseng transcript unigenes [34] by TBLASTN at E-value  $\leq 1e-6$ . The obtained sequences were then  
116 used as a query to search for homologs in the ginseng line IR826 genome database [36]. Furthermore,  
117 TBLASTN were performed again to search the 248,993 transcript unigenes [34] using the homologs as  
118 query with E-value  $\leq 1e-6$  to maximize identification of the AP2/ERF family genes in ginseng. After  
119 merged all these aforementioned results, the identified genes were defined as *PgERF* for the AP2/ERF  
120 genes in ginseng and extracted by a Perl programming software. Finally, the predicted *PgERF* genes  
121 were analyzed by the conserved domain database (CDD)  
122 (<http://www.ncbi.nlm.nih.gov/Structure/cdd/wrpsb.cgi>) and the ORF Finder  
123 (<http://www.ncbi.nlm.nih.gov/gorf/gorf.html>) at NCBI.

## 124 **2.3 Multiple sequence alignment and phylogenetic analysis of *PgERF* genes**

125 The encoded AP2 domain of the *PgERF* genes was aligned using the ClustalW program [39] and  
126 an unrooted phylogenetic tree was first constructed from the genes to have a preliminary phylogenetic  
127 tree of the *PgERF* genes. Then, another unrooted phylogenetic tree was constructed using 93 of the  
128 predicted *PgERF* genes representing the AP2/ERF family in ginseng and 147 *AtERF* genes previously  
129 identified and annotated in Arabidopsis [7]. These two phylogenetic trees were both constructed using

130 MEGA 5.0 by the Neighbor-Joining method with 1,000 bootstrap replications, using the Poisson  
131 correction model and the pairwise deletion [40].

## 132 **2.4 Motif prediction of *PgERF* genes**

133 The putative protein sequences of the above 93 *PgERF* genes used for construction of the  
134 AP2/ERF family phylogenetic tree were subjected to the online software, MEME (multiple EM for  
135 motif elicitation, V5.0.3) (<http://meme-suite.org/tools/meme>) [41] to identify the conserved motifs of  
136 these predicted *PgERF* genes in ginseng. Motif length was set to 6 - 50 amino acids and the maximum  
137 number of motifs was set to 25, while other parameters were set as default.

## 138 **2.5 Expression and functional networks of *PgERF* genes**

139 The expression profiles of all putative transcripts of *PgERF* genes identified above were extracted  
140 by a Perl programming software from the above four transcriptome databases: (1) the 14 tissues of a  
141 Jilin ginseng four-year-old plant, (2) the roots of Jilin ginseng 5-, 12-, 18- and 25-year-old plants, (3)  
142 the four-year-old roots in 42 Jilin ginseng genotypes and (4) the ginseng cv. Cheongsun adventitious  
143 roots treated with 200  $\mu$ M MeJA for 0, 12, 24 and 48 h, respectively. The expression profiles of the  
144 putative transcripts of *PgERF* genes were measured as transcripts per million (TPM) and visualized by  
145 expression heatmap using the R programming language and software (<http://www.r-project.org/>,  
146 [V3.3.3](#)). Finally, the co-expression networks of these *PgERF* gene transcripts were constructed and  
147 analyzed among different tissues and different genotypes of Jilin ginseng using the BioLayout  
148 Express<sup>3D</sup> software (Version 3.2) [42].

## 149 **2.6 Expression activity of *PgERF* genes responding to cold stress**

150 Equivalent ginseng hair roots (1 gram) were freshly cut from mature hair roots and cultured with

151 250 ml 1/2 Murashige and Skoog (MS) medium in dark culture at 22°C for 30 days. Then, to simulate  
152 the cold stress treatments, the 30-days-old hair roots were placed in 4°C for 6 h, 24 h, 48 h and 72 h,  
153 respectively. Afterwards, the ginseng hair roots were harvested and stored in -80°C for the RNA  
154 isolation and further quantitative real-time PCR analysis. The total RNA of ginseng hair roots was  
155 extracted by TRIzol reagent (Biotek, Beijing, China) according to the manufacturer's instructions,  
156 which was further reverse transcribed into cDNA using a PrimeScript™ RT reagent Kit with gDNA  
157 Eraser (TaKaRa, Tokyo, Japan), following the manufacturer's instructions. In this study, quantitative  
158 real-time PCR (qRT-PCR) of six *PgERF* genes, including *PgERF073*, *PgERF079*, *PgERF110*,  
159 *PgERF115*, *PgERF120* and *PgERF128*, was performed. The *PgGADPH* gene was used as the internal  
160 reference. The gene-specific primers used in qRT-PCR were designed by Primer Premier Software  
161 (version 5) and were listed in Table S1. The qRT-PCR was conducted by an Applied Biosystems 7500  
162 Real Time PCR System (Thermo Fisher Scientific, Waltham, MA, USA) and SYBR Premix Ex Taq™  
163 II (TaKaRa, Tokyo, Japan). The qRT-PCR was performed using the following steps: 30 seconds at  
164 95°C; forty cycles of 5 seconds at 95°C and 34 seconds at 60°C; one cycle of 15 seconds at 95 °C and  
165 60 seconds at 60°C; 15 seconds at 95 °C. The relative expression levels of these selected genes were  
166 calculated using formula  $2^{-\Delta\Delta C_t}$  [43], and all the experiments were amplified in triplicate.

### 167 **3. Results**

#### 168 **3.1 Identification and classification of *PgERF* genes**

169 A total of 397 transcripts that were derived from 189 predicted *PgERF* genes, including those  
170 containing a partial or complete AP2/ERF domain, were identified. These *PgERF* genes were defined  
171 *PgERF001* to *PgERF189*, with a suffix (e.g., -1) for different transcripts derived from the same gene  
172 (Table S2). Then, the sequences of 342 AP2/ERF gene transcripts downloaded from Ginseng Genome  
173 Database (<http://ginsengdb.snu.ac.kr/index.php>) were aligned with 397 transcripts identified in this  
174 study with identity  $\geq 95\%$ , alignment length  $\geq 200$  bp (about AP2 maximum domain length). As a result,



175 138 (73%) *PgERF* genes which contained 302 transcripts (88%) identified in this study were similar to  
176 266 (78%) transcripts of the AP2/ERF gene from Ginseng Genome Database, which were supposed to  
177 the same genes (Fig.S1 and Table S3). However, the other 51 (27%) *PgERF* genes, whose sequences  
178 were quite different from Korean ginseng AP2/ERF genes, were assigned as newly discovered  
179 AP2/ERF genes in ginseng (Fig.S1 and Table S3). The *PgERF* gene transcripts identified in this study  
180 had nucleotide sequences ranging from 203 bp to 2,897 bp, with an average length of 1,216 bp. Of  
181 these 397 *PgERF* gene transcripts, 176, derived from 96 *PgERF* genes, had partial AP2 domains, or  
182 complete AP2 domains but being outside of open reading frames (ORFs). The remaining 221 *PgERF*  
183 transcripts, derived from 93 *PgERF* genes, had complete AP2 domains within ORFs. Therefore, these  
184 221 *PgERF* transcripts were further analyzed. The 221 *PgERF* gene transcripts encode putative  
185 proteins with a length varying from 96 to 561 amino acids, with an average length of 256 amino acids  
186 (Table S4). Analysis using the ExPASy Server showed that these putative proteins had an isoelectric  
187 point between 4.43 (*PgERF025*) and 11.12 (*PgERF180*) and a molecular mass ranging from 11.00 kDa  
188 (*PgERF140*) to 62.83 kDa (*PgERF159*) (Table S4).

189 Sakuma et al. [6] classified that the Arabidopsis AP2/ERF family into five subfamily, ERF, DREB,  
190 AP2, RAV and Soloist. We also classified the 93 predicted *PgERF* genes whose transcripts had  
191 complete AP2 domains within ORFs into these five subfamilies, according to the structures and the  
192 number of AP2/ERF domains. These five *PgERF* subfamilies, ERF, DREB, AP2, RAV and Soloist,  
193 contained 27, 48, 14, 2 and 2 genes, respectively (Fig. 1). Specifically, two genes, *PgERF035* and  
194 *PgERF084*, were classified into the Soloist subfamily due to their low homology with the remaining  
195 AP2/ERF genes and their high homology with the Arabidopsis Soloist subfamily gene, *AT4G13040*.  
196 The *PgERF112* gene was the only one that codes one AP2/ERF domain with one B3 domain; therefore,  
197 it was classified into the RAV subfamily. Moreover, *PgERF171* was also classified into the RAV

198 subfamily, even though it does not contain the B3 domain, because it has a high homology with the  
199 Arabidopsis RAV subfamily genes, *ATIG51120* and *ATIG50680*. As seven *PgERF* genes, *PgERF062*,  
200 *PgERF089*, *PgERF134*, *PgERF135*, *PgERF142*, *PgERF148* and *PgERF159*, contain two repeated  
201 AP2/ERF domains, they were classified into the AP2 subfamily. In addition, another seven *PgERF*  
202 genes, including *PgERF020*, *PgERF045*, *PgERF048*, *PgERF076*, *PgERF101*, *PgERF132* and  
203 *PgERF140*, were also classified into the AP2 subfamily as they have high sequence similarity with the  
204 members of the AP2 subfamily, even though they do not contain two repeated AP2/ERF domains. Of  
205 the 75 remaining *PgERF* genes, 48 and 27 were classified into the ERF and DREB subfamilies,  
206 respectively (Fig. 1). Furthermore, the DREB and ERF subfamilies of ginseng were each further divided  
207 into six groups, A1 through A6 and B1 through B6, respectively, or these two subfamilies were divided  
208 into 12 groups, from I to X, VI-L and Xb-L, based on Nakano et al. [7] (Fig. 1).

209 Figure 1. Phylogenetic tree of the AP2/ERF gene family present in ginseng and Arabidopsis. The  
210 amino acid sequences of the AP2 domain were aligned using Clustal W and the phylogenetic tree was  
211 constructed using neighbor-joining method.

### 212 **3.2 Phylogenetic analysis of the *PgERF* gene family**

213 To determine the phylogeny of the *PgERF* gene family, the 93 predicted *PgERF* genes whose  
214 transcripts had complete AP2 domains were also used. An unrooted phylogenetic tree was constructed  
215 from the 93 predicted *PgERF* genes for the *PgERF* gene family. The result showed that the *PgERF*  
216 gene family was apparently classified into five clades, corresponding to ERF, DREB, AP2, RAV and  
217 Soloist subfamilies (Fig. S2). Then, we constructed an unrooted phylogenetic tree of the *PgERF* gene  
218 family using 147 Arabidopsis annotated *AtERF* genes as controls based on their conserved AP2  
219 domains. The resultant phylogenetic tree clustered the 93 *PgERF* genes and 147 *AtERF* genes into 15  
220 distinct clades, of which 13 was corresponding to the I, II, III, IV, V, VI, VII, VIII, IX and X groups of

221 the DREB and ERF subfamilies, and AP2, RAV and Soloist subfamilies of the *PgERF* family, and two,  
222 corresponding to Xb-L and VI-L groups of the DREB and ERF subfamilies, had only *AtERF* genes  
223 (Fig. 2). This result was consistent with the classification of the AP2/ERF family.

### 224 3.3 Motif identification and multiple sequence alignment

225 Next, the 93 predicted *PgERF* genes were subjected to conservative analysis for the conserved  
226 motifs of their proteins (Fig. 2; Fig. S3). A total of 25 conserved motifs were identified for the putative  
227 proteins of the 93 predicted *PgERF* genes, which were herein designated as Motif 1 through Motif 25.  
228 Motif 1 to Motif 6 were located in the AP2/ERF domain and the remaining 19 motifs, including Motif 7  
229 through Motif 25, were found outside the AP2/ERF domain. The *PgERF* proteins encoded by gene  
230 members of the same subfamily or group contained similar conserved motifs. For example, Motifs 4, 7,  
231 15, 16, 17, 21 and 25 were specifically shared by gene members of the AP2 subfamily. Motifs 14 and  
232 18 were specifically present within Group I, while Motifs 9 and 20 were only present in the Group III  
233 gene members of the ERF subfamily. Motifs 10, 11, 12, 13, and 19 were specific for the DREB  
234 subfamily and absent in all four other subfamilies (ERF, AP2, RAV and Soloist subfamilies). These  
235 results suggested that most of the 25 motifs were divergent among subfamilies or groups, which might  
236 play an important role in their functional divergence [25].

237 Figure 2. Distribution of conserved motifs among the gene members of the *PgERF* family. Each motif  
238 is represented by a colored box. Box length corresponds to the motif length.

239 As the featured sequences within the specific domains of transcription factors are critical to their  
240 functions [44], the conserved amino acid residues of the AP2 domains were identified for the genes of  
241 both DREB and ERF subfamilies. By aligning the amino acid sequences of the AP2 domains of these  
242 two subfamilies in ginseng and Arabidopsis, 14 conserved amino acid residues, including 4G, 6R, 8R,

243 15W, 16V, 18E, 20R, 22P, 39W, 40L, 49A, 52A, 54D and 72N, and 11 conserved amino acid residues,  
244 including 4G, 6R, 8R, 11G, 17I, 30R, 42A, 46Y, 47D, 55G and 63F, were identified for the DREB and  
245 ERF subfamilies, respectively (Fig. S4 and S5). Besides, all gene members of the DREB subfamily and  
246 ERF subfamily obviously contained the two featured conserved elements, including YRG and RAYD,  
247 in their AP2 domains.

### 248 **3.4 Functional categorization of the *PgERF* genes**

249 To estimate the functional differentiation of the *PgERF* family, all 397 transcripts of the 189  
250 *PgERF* genes identified in this study were annotated and functionally categorized using the Blast2GO  
251 software (Version 4.1.9) [45]. Surprisingly, only 195 (49%) of the *PgERF* gene transcripts could be  
252 annotated, while the remaining 202 could not be annotated using the database of the Blast2GO software,  
253 suggesting the uniqueness of the *PgERF* genes in ginseng. The annotated *PgERF* gene transcripts were  
254 categorized into all three primary gene ontology (GO) categories, molecular function (MF), biological  
255 process (BP) and cellular component (CC) (Fig. 3A). Of the 195 *PgERF* transcripts, 186 (95%) were  
256 categorized into all the three primary categories, MF, BP and CC. Only one *PgERF* gene transcript,  
257 *PgERF069*, had functions in both BP and CC categories, while two *PgERF* transcripts, *PgERF135-1*  
258 and *PgERF135-3*, and six *PgERF* transcripts, *PgERF152-3*, *PgERF152-4*, *PgERF152-1*, *PgERF152-2*,  
259 *PgERF105-3* and *PgERF087*, were categorized into BP and CC, respectively. At Level 2, these 195  
260 transcripts were further categorized into eight subcategories, including nucleic acid binding  
261 transcription factor activity, binding, metabolic process, cellular process, developmental process,  
262 organelle, cell part and cell (Fig. 3B). Of the eight subcategories, three subcategories, including nucleic  
263 acid binding transcription factor activity, binding and cell part subcategories, have been significantly  
264 enriched, which is consistent with the transcription regulation functions of the *ERF* genes, while the

265 abundances of the remaining five subcategories are either not changed or significantly reduced relative  
266 to the whole genome background control.

267 Figure 3. Functional categorization of the AP2/ERF gene family in ginseng. (A) Venn diagram of  
268 the *PgERF* gene transcripts categorized into three primary categories, biological process (BP),  
269 molecular function (MF) and cellular component (CC). (B) The subcategories of the *PgERF* gene  
270 transcripts (Level 2). The enrichment of the *PgERF* gene transcripts in each subcategory was calculated  
271 using all the gene transcripts of ginseng as the background control. A single asterisk “\*” indicates the  
272 significant difference of the number of *PgERF* gene transcripts categorized into the subcategory from  
273 that of all the gene transcripts of ginseng at  $P \leq 0.05$ , while double asterisks “\*\*” indicate the difference  
274 at a significance level of  $P \leq 0.01$ .

275 Furthermore, the *PgERF* transcripts expressed in the roots of 5-, 12-, 18- and 25-year-old plants,  
276 14 tissues of the 4-year-old plant, and the roots of 4-year-old plants of 42 genotypes were further  
277 categorized (Fig. 4). The *PgERF* transcripts expressed in differently-aged plant roots, different tissues  
278 and the roots of different genotypes were all categorized into these eight subcategories, suggesting that  
279 the functions of *PgERF* transcripts were consistent among developmental stages, tissues or genotypes.  
280 Nevertheless, a substantial variation of the categorization in the numbers of the *PgERF* transcripts  
281 categorized into these eight categories (Level 2) was observed across developmental stages, tissues or  
282 genotypes.

283 Figure 4. Variation in functional categories of the *PgERF* gene transcripts. (A) Variation in  
284 functional categories among the roots of differently aged plants. (B) Variation in functional categories  
285 among 14 tissues of a 4-year-old plant. (C) Variation in functional categories among the 4-year-old

286 plant roots of 42 genotypes.

### 287 **3.5 Expression profiles and networks of the *PgERF* genes**

288 To profile the activation patterns of *PgERF* genes, the expressions of all 397 transcripts were  
289 quantified in 5-, 12-, 18- and 25-year-old plant roots, 14 4-year-old plant tissues and the roots of  
290 4-year-old plants of 42 genotypes. The expressions of the transcripts varied dramatically across  
291 developmental stages, tissues and genotypes, from silenced (0.0 TPM) to 586.3, 666.0 and 1159.2  
292 TPM, respectively. Of the 397 *PgERF* transcripts, 136 (34.3%), 98 (24.7%) and 83 (20.9%) expressed  
293 in all 5-, 12-, 18- and 25-year-old plant roots, all 14 4-year-old plant tissues and the roots of 4-year-old  
294 plants of all 42 genotypes, respectively (Tables S5-S7), while 53 (13.4%), 39 (9.8%) and 14 (3.5%) of  
295 the 397 transcripts were development-, tissue- and genotype-specific, respectively. Nevertheless, the  
296 expression of a transcript varied dramatically across developmental stages, tissues and genotypes.

297 Moreover, we constructed the heatmaps of the *PgERF* genes expressed at different  
298 developmental stages of roots, in different tissues, and across different genotypes to find out whether  
299 the expressions of the genes were co-regulated. The results showed that although the expression  
300 co-regulation was observed for some of the genes at a developmental stage, a single tissue or a  
301 genotype and across developmental stages, it was not apparent across tissues or genotypes (Fig. 5). For  
302 instance, *PgERF140-12*, *PgERF046*, *PgERF089-3*, *PgERF093-3*, *PgERF108-1*, *PgERF184*,  
303 *PgERF118-2* and *PgERF170* were apparently co-regulated at a developmental stage and across  
304 developmental stages of roots (Fig. 5A).

305 Figure 5. Expression heatmaps of the *PgERF* gene transcripts at different developmental stages,  
306 in different tissues and across genotypes. (A) In the roots of different year-old plants. (B) In the 14  
307 tissues of a 4-year-old plant. (C) In the 4-year-old plant roots of 42 genotypes.

308 To determine the functional relationships of the *PgERF* genes, the co-expression network of the

309 *PgERF* transcripts were constructed for 14 tissues of a four-year-old plant and the four-year-old plant  
310 roots of 42 genotypes, respectively. Of the 397 *PgERF* gene transcripts, 364 (91.7%) formed a  
311 co-expression network ( $P \leq 0.05$ ) in the 14 tissues of the four-year-old plant (Fig. S6A). The network  
312 consisted of 364 gene transcript nodes, 5,303 co-expression edges and 17 closer co-expression clusters  
313 (Fig. S6A and B). Nevertheless, the tendency of this network formation had no substantial difference  
314 from that of the network formed from randomly selected ginseng gene transcripts (Fig. S6C and D). In  
315 the four-year-old plant roots of different genotypes, 341 (85.9%) of the 397 *PgERF* gene transcripts  
316 formed a co-expression network ( $P \leq 0.05$ ), consisting of 341 gene transcript nodes, 5,606  
317 co-expression edges and 24 clusters (Fig. 6A and B). The tendency of this network formation was  
318 stronger in terms of number of nodes and number of edges than that of the network formed from  
319 randomly selected ginseng gene transcripts (Fig. 6C and D). Together, analysis of these networks  
320 revealed that the gene members of the *PgERF* gene family were functionally quite independent, even  
321 though some of them formed a co-expression network, because the tendency of the network formation  
322 was similar to that of randomly-selected unknown genes.

323 Figure 6. Co-expression network of the *PgERF* gene transcripts in the 4-year-old plant roots of 42  
324 genotypes. (A) The co-expression network constructed from 342 of the 397 *PgERF* gene transcripts at  $P$   
325  $\leq 0.05$ . (B) 17 clusters of the network. (C) Variation in number of nodes in the network of *PgERF*  
326 transcripts at different  $P$ -values. (D) Variation in number of edges in the network of *PgERF* transcripts  
327 at different  $P$ -values.

### 328 **3.6 Expression profiles of the *PgERF* genes in responding to cold stress**

329 As a perennial herb, ginseng is frequently suffering from various environmental stresses.  
330 However, to date, the molecular mechanisms of the stress tolerance in ginseng were not clearly

331 clarified. To discover the potential functions of *PgERF* genes in resistance cold stress, the expression  
332 patterns of six *PgERF* genes randomly selected from DREB subfamily, i.e., *PgERF073*, *PgERF079*,  
333 *PgERF110*, *PgERF115*, *PgERF120* and *PgERF128*, in cold-stressed ginseng hair roots were analyzed  
334 by qRT-PCR. As shown in Fig.7D and 7E, two members of I group of DREB subfamily, i.e.,  
335 *PgERF115* and *PgERF120* were firstly up-regulated but then somewhat different from each other by  
336 cold stress. Expression of *PgERF115* gradually rose and the highest change showed at cold stress for  
337 24 h (about 13.06 times higher than the untreated hair roots), and after that time point, the expression  
338 level of *PgERF115* declined regularly. *PgERF120* respond quickly to cold stress, reaching a 26.88  
339 times higher than the untreated hair roots in cold-stressed ginseng hair roots for 6 h and regularly  
340 declined to normal level. Similarly, the expression of *PgERF073* and *PgERF110*, two members of II  
341 group, were also somewhat different from each other. The expression of *PgERF073* showed similar  
342 trends to *PgERF115* while the expression of *PgERF110* showed similar trends to *PgERF120* (Fig.7A  
343 and 7C). *PgERF079*, a member from III group of DREB subfamily, responded rapidly and drastically  
344 to the cold stress, whose expression were significantly up-regulated by 1057.05, 274.44, 290.81 and  
345 173.03 times in cold-stressed for 6 h, 24 h, 48 h and 72 h comparing to the untreated hair roots ( $P <$   
346  $0.01$ ) (Fig.7B). *PgERF128*, which belonged to the IV group of DREB subfamily, exhibited particular  
347 trend comparing with the other 5 *PgERF* genes. As shown in Fig.7F, the expression levels of  
348 *PgERF128* were rising gradually in ginseng hair roots under cold stress for 6 h, 24 h, 48 h and 72 h. At  
349 72 h, the expression of *PgERF128* in cold-stressed ginseng hair roots were significantly up-regulated  
350 by 5.68 times than the untreated hair roots ( $P < 0.01$ ).

351 Figure 7. Expression levels of *PgERF* genes in ginseng hair roots after 6, 24, 48 h and 96 h of cold  
352 stress treatment. The values were given as mean  $\pm$  SD of triplicate samples. Different letters represent  
353 significant differences between the treatment means ( $p < 0.05$ , LSD).

### 354 **3.6 Expression profiles of the *PgERF* genes in responding to MeJA**



355 MeJA is a plant hormone and a kind of elicitors and has been widely used in regulation of genes  
356 involved in ginsenoside biosynthesis in ginseng [38]. Therefore, we further analyzed the expressions of  
357 the *PgERF* genes in the adventitious roots of ginseng treated with MeJA for 0, 12, 24 and 48 h,  
358 respectively. The expressions of the *PgERF* gene transcripts in the control and MeJA-treated  
359 adventitious roots varied from silent (0 TPM) to 197.731 TPM (Table S8). Of the 397 *PgERF* gene  
360 transcripts profiled, 173 (43.6%) expressed and 109 (27.5%) silenced in the control and all treated  
361 adventitious roots, and the remaining 115 (29.0%) either expressed or silenced in these adventitious  
362 roots. The expressions of the 288 *PgERF* gene transcripts expressed the adventitious roots were  
363 visualized by the expression heatmap (Fig. 8). Overall, all the 288 *PgERF* gene transcripts responded to  
364 the MeJA treatment, with 136 of them up-regulated and 152 down-regulated by MeJA. Among the  
365 three treatment times, 12 h, 24 h and 48 h, the responses of these *PgERF* gene transcripts to MeJA  
366 varied from time to time.

367 Figure 8. Expression heatmap of the *PgERF* gene transcripts treated with 200  $\mu$ M MeJA for 0, 12,  
368 24 and 48 h, respectively.

#### 369 **4. Discussion**

370 The AP2/ERF gene family has been broadly studied in several plant species of economical or  
371 biological importance due to its important roles in various biological processes, including growth and  
372 development, and responses to environmental stresses based on genome and transcriptome sequences  
373 [5]. These species include Arabidopsis [6], rice [7], wheat [46], maize [26], cotton [3], grapevine [28],  
374 cucumbers [47] and rubber tree [48]. We have, in this study, comprehensively investigated the  
375 AP2/ERF genes in ginseng using several transcriptome databases, including those developed from 14  
376 tissues of a four-year-old ginseng plant, the roots of 5-, 8-, 12- and 25-year-old plants and the  
377 four-year-old plant roots of 42 diverse genotypes. The *PgERF* gene family in ginseng is also a large

378 gene family, consisting of 189 or more gene members. This result is in consistence with those identified  
379 in other plant species such as Arabidopsis [6], rice [7] and grapevine [28]. Although the family size is  
380 non-comparable with those identified in the other species listed above due to the dramatic variation of  
381 gene family size within a plant species [49] and the difference of the databases used for these analyses,  
382 the *PgERF* gene family is unambiguously classified into five subfamilies, ERF, DREB, AP2, RAV and  
383 Soloist, as were those identified in Arabidopsis [6], rice [7] and grapevine [28]. These results indicate  
384 the *PgERF* gene family has a similar functional differentiation pattern as those in the three latter  
385 species.

386 It has been consensus that the conserved motifs of the AP2/ERF transcription factor are crucial to  
387 the function of transcription factors, such as nuclear localization and transcriptional activity [7]. The  
388 DNA binding domain of AP2/ERF transcription factors, i.e., AP2 domain, was highly conserved in  
389 plant species [50],[51]. The AP2 domain of the *PgERF* genes was also found to be highly conserved.  
390 This study has identified 14 and 11 completely conserved amino acid residues through all gene  
391 members of the DREB and ERF subfamilies, respectively, in both ginseng and Arabidopsis (Figs. S3  
392 and S4). In Arabidopsis, the two conservative elements, YRG and RAYD, were shown to be critical to  
393 the binding of AP2/ERF transcription factors to the promoter regions of the target genes and modulate  
394 their expression [29]. The conservative YRG and RAYD elements identified in the AP2 domain of the  
395 DREB and ERF subfamilies in ginseng may suggest their necessity for similar functions of the *PgERF*  
396 genes. Nevertheless, subtle variation exists among the amino acid sequences of *PgERF* transcription  
397 factors, which has led to the separation of the DREB subfamily from the ERF subfamily. The difference  
398 between the DREB and ERF subfamilies might result in their functional divergence in ginseng.  
399 Moreover, the “EIR” in the AP2 domain was found to be shared by all gene members of the ERF

400 subfamily and the vast majority of the gene members of the DREB subfamily in both ginseng and  
401 Arabidopsis, while the “EVR” exists only in Group III of the DREB subfamily in both ginseng and  
402 Arabidopsis and only in Group II (*PgERF061*) of the DREB subfamily in ginseng. It has been reported  
403 that the sequence similarity of the conserved motifs that exist outside of the DNA binding domain was  
404 low [6],[27],[43]. In ginseng, 19 conserved motifs, except for Motif 1 to Motif 6, were identified  
405 outside the AP2 domain. The vast majority of these 19 motifs were found to be divergent across  
406 subfamilies or even subfamily groups in ginseng. The subfamily/group-specific distribution pattern of  
407 these motifs might have led to the functional divergence between subfamilies or groups of the *PgERF*  
408 transcription factors.

409 Because different transcripts alternatively spliced from the same gene may have different  
410 functions [52], the 397 *PgERF* transcripts, instead of the 189 *PgERF* genes, were annotated and  
411 functionally categorized in this study. The *PgERF* transcripts were categorized into eight subcategories  
412 at Level 2. Although this result suggested a substantial functional differentiation of the *PgERF* genes,  
413 the differentiation was much smaller than those observed in the *PgNBS* gene family [35], *PgRLK* gene  
414 family [53] and *PgCYP* gene family [54] in ginseng. Interestingly, of the eight Level 2 subcategories,  
415 only two, especially those in the nucleic acid binding transcription factor activity subcategory, were  
416 significantly up-enriched, which is consistent with the roles of the *PgERF* genes as transcription factors  
417 by binding to the promoters of target genes. While the functions of the AP2/ERF genes have been  
418 shown to play important roles in plant growth and development, response to stresses and signal  
419 pathway in the model plants such as Arabidopsis and rice [5],[55], further research is needed to  
420 determine the functions of the *PgERF* genes in ginseng.

421 Companioned with their functional differentiation, the expressions of 397 *PgERF* transcripts  
422 dramatically varied in a tissue, at a development stage or in a genotype. Moreover, the type and number

423 of expressed *PgERF* transcripts also diversified tempo-spatially and across genotypes. The differential  
424 expressions of the AP2/ERF genes were previously reported in other plant species, but mainly among  
425 tissues [25],[56]. Furthermore, the numbers of the *PgERF* transcripts categorized into each subcategory  
426 varied across tissues, developmental stages or genotypes. These variations might be an indication of  
427 their functional differentiation. On the other hand, co-expression network analysis revealed that most  
428 (>86%) of these *PgERF* transcripts express correlatively and tend to form a co-expression network in  
429 different tissues or different genotypes. These results suggest that the *PgERF* genes have functionally  
430 differentiated, but they are still somehow functionally collaborative.

431 As a perennial herb, ginseng frequently suffers from different kinds of environmental stresses. It  
432 was reported that members of AP2/ERF superfamily, especially DREB subfamily, played an essential  
433 role in response to biotic and abiotic stresses [16],[17],[57]. To tap the potential AP2/ERF genes of  
434 DREB subfamily resisting to cold stress in ginseng, the expression of six genes randomly selected from  
435 DREB subfamily under cold stress were analyzed using qRT-PCR. The expression of *PgERF079*, one  
436 gene from III group or A1 group of DREB subfamily, was dramatically changed (up to 1057.05 times  
437 with a brief period of cold-stressed for 6 h), suggesting it played an extremely important role in freezing  
438 tolerance. In fact, A-1 group was considered to be the major regulator of cold-stress responses as  
439 overexpressing any one of the three cold-inducible DREB1s, DREB1A/CBF3 (AT4G25480),  
440 DREB1B/CBF1 (AT4G25490) and DREB1C/CBF2 (AT4G25470), significantly improved freezing  
441 tolerance in Arabidopsis [57],[58],[59]. Besides, the expression level of the other five genes from other  
442 groups of DREB subfamily, i.e., *PgERF073*, *PgERF110*, *PgERF115*, *PgERF120* and *PgERF128*, also  
443 showed significant changes ( $p<0.01$ ) in cold-stressed ginseng hair roots. Therefore, it speculates that  
444 besides A1 group, the other groups of DREB subfamily may also be effective in freezing tolerance in

445 ginseng, either directly or indirectly. Herein, the results of these cold-inducible genes would provide  
446 some valuable information for the functional studies of *PgERF* genes in ginseng in the future.

447 It has been reported that some genes of the AP2/ERF family are involved in response to hormone  
448 signals in plants [60],[61],[62]. It was showed that MeJA, as one of the signaling molecules, was rapidly  
449 synthesized in plants, when subjected to various biotic and abiotic stresses, and then, induced  
450 defense-related responses to the stresses and regulate plant growth and development [63]. MeJA has  
451 been also used as an effective elicitor, since it can stimulate the biosynthesis of plant secondary  
452 metabolites [64],[65],[66]. The biosynthesis and accumulation of ginsenosides, a cluster of important  
453 secondary metabolites and the most valuable bioactive components in ginseng, were also reported to be  
454 induced by MeJA [67],[68]. This study showed that the addition of exogenous MeJA to adventitious  
455 roots dramatically changed the expression of a majority of the *PgERF* gene transcripts. The expressions  
456 of some of the transcripts were up-regulated while those of the other down-regulation or inhibited by  
457 MeJA, relative to the control not treated by MeJA. Given the demonstrated functions of MeJA in plant  
458 responses to biotic and abiotic stresses, growth and development and secondary metabolite biosynthesis  
459 in other plant species [57],[60],[61],[62],[63],[64],[65],[66], the *PgERF* genes may also be involved in  
460 these processes, including the biosynthesis of ginsenosides.

## 461 **5. Conclusions**

462 The present study, for the first time, reports identification and systematic characterization of the  
463 AP2/ERF family present in ginseng, i.e., the *PgERF* gene family. A total of 189 *PgERF* genes that were  
464 actively expressed in 14 tissues of a four-year-old ginseng plant were identified and these genes were  
465 alternatively sliced into 397 transcripts. These *PgERF* genes were also classified into five subfamilies

466 (DREB, ERF, AP2, RAV and Soloist) as those previously identified in Arabidopsis. As expected, the  
467 conserved motifs that characterize the AP2/ERF family and several conserved domains were identified  
468 among the members of the *PgERF* gene family. Nevertheless, the transcripts of the *PgERF* genes were  
469 apparently categorized into eight subcategories by GO, especially into the subcategory for nucleic acid  
470 binding transcription factor activity, which indicates their functional differentiation. Along with their  
471 functional differentiation, the expressions of the *PgERF* genes, including the type, number and  
472 expression level of their transcripts, have also substantially diversified tempo-spatially and across  
473 genotypes. In spite of these differentiations, most of the *PgERF* genes remain to co-express and form a  
474 co-expression network, suggesting that most of the genes in the *PgERF* gene family remain functionally  
475 correlated. These *PgERF* genes and findings provide resources and knowledge valuable for family-wide  
476 functional analysis of the *PgERF* genes and determination of their roles in plant responses to biotic and  
477 abiotic stresses, growth and development, and biosynthesis of secondary metabolites, especially  
478 ginsenosides, in *P. ginseng* and related species.

#### 479 **SUPPLEMENTARY MATERIAL**

480 Supplemental information is available with the online version of this manuscript.

#### 481 **ACKNOWLEDGMENT**

482 This research was supported by an award from China 863 Project (2013AA102604-3), the Bureau  
483 of Science and Technology of Jilin Province (20190201264JC, 20170101010JC, 20180414077GH,  
484 20180101027JC), the Development and Reform Commission of Jilin Province (2016C064,  
485 2018C047-3), and a startup fund from Jilin Agriculture University (201801, <https://www.jlau.edu.cn/>).

#### 486 **AUTHOR CONTRIBUTIONS**

487 MPZ and YW planned and designed this study; JC and QZ performed the bioinformatic analysis;  
488 JC wrote the manuscript; LL, YZ, PC, HL, RL, YH, CS, KW, JL, MZ and YFW prepared the tables and  
489 figures. MPZ revised the manuscript. All the authors read and approved the final version of the  
490 manuscript.

## 491 REFERENCES

- 492 1. Mawlong I, Ali K, Srinivasan R, Rai RD, and Tyagi A (2015) Functional validation of a  
493 drought-responsive AP2/ERF family transcription factor-encoding gene from rice in  
494 *Arabidopsis*. *Mol. Breeding* 35, 163.
- 495 2. Chinnusamy V, Zhu J, and Zhu JK (2007) Cold stress regulation of gene expression in plants. *Trends*  
496 *Plant Sci.* 12, 444-451.
- 497 3. Champion A, Hebrard E, Parra B, Bournaud C, Marmey P, Tranchant C, et al. (2009) Molecular  
498 diversity and gene expression of cotton ERF transcription factors reveal that group IXa  
499 members are responsive to jasmonate, ethylene and *Xanthomonas*. *Mol. Plant Pathol.* 10,  
500 471-485.
- 501 4. Gutterson N, and Reuber TL (2004) Regulation of disease resistance pathways by AP2/ERF  
502 transcription factors. *Curr. Opin. Plant Bio.* 7, 465-471.
- 503 5. Francesco L, Masaru OT, and Pierdomenico P (2013) APETALA2/Ethylene Responsive Factor  
504 (AP2/ERF) transcription factors: mediators of stress responses and developmental programs.  
505 *New Phytol.* 199, 639-649.
- 506 6. Sakuma Y, Liu Q, Dubouzet JG, Abe H, Shinozaki K, and Yamaguchishinozaki K (2002)  
507 DNA-Binding Specificity of the ERF/AP2 Domain of Arabidopsis DREBs, Transcription  
508 Factors Involved in Dehydration- and Cold-Inducible Gene Expression. *Biochem. Bioph. Res.*

509 Co. 290, 998-1009.

- 510 7. Nakano T, Suzuki K, Fujimura T, and Shinshi H (2006) Genome-wide analysis of the ERF gene  
511 family in Arabidopsis and rice. *Plant Physiol.* 140, 411.
- 512 8. Li MY, Xu ZS, Huang Y, Tian C, Wang F, and Xiong AS (2015) Genome-wide analysis of  
513 *AP2/ERF* transcription factors in carrot (*Daucus carota* L.) reveals evolution and expression  
514 profiles under abiotic stress. *Mol. Genet. Genomics* 290, 2049.
- 515 9. Mrunmay Kumar G, Swadhin S, Janesh Kumar G, Subaran S, Nidhi S, Lipika B, et al. (2014) The  
516 *Arabidopsis thaliana At4g13040* gene, a unique member of the AP2/EREBP family, is a  
517 positive regulator for salicylic acid accumulation and basal defense against bacterial pathogens.  
518 *J. Plant Physiol.* 171, 860-867.
- 519 10. Song X, Li Y, and Hou X (2013) Genome-wide analysis of the AP2/ERF transcription factor  
520 superfamily in Chinese cabbage (*Brassica rapa* ssp. *pekinensis*). *Bmc Genomics* 14, 573.
- 521 11. Nole-Wilson S, and Krizek BA (2000) DNA binding properties of the Arabidopsis floral  
522 development protein AINTEGUMENTA. *Nucleic Acids Res.* 28, 4076-4082.
- 523 12. Krizek BA (2009) *AINTEGUMENTA* and *AINTEGUMENTA-LIKE6* Act Redundantly to Regulate  
524 Arabidopsis Floral Growth and Patterning. *Plant Physiol.* 150, 1916-1929.
- 525 13. Mi-Young C, Julia V, Rob A, Jemin L, Ryan MQ, Jae-Dong C, et al. (2010) A tomato (*Solanum*  
526 *lycopersicum*) APETALA2/ERF gene, *SLAP2a*, is a negative regulator of fruit ripening. *Plant J.*  
527 64, 936-947.
- 528 14. Kagaya Y, Ohmiya K, and Hattori T (1999) RAV1, a novel DNA-binding protein, binds to bipartite  
529 recognition sequence through two distinct DNA-binding domains uniquely found in higher  
530 plants. *Nucleic Acids Res.* 27(2), 470-478.



- 531 15. Feng CZ, Yun C, Wang C, Kong YH, Wu WH, and Chen YF (2014) The Arabidopsis RAV1  
532 transcription factor, phosphorylated by SnRK2 kinases, regulates the expressions of *ABI3*, *ABI4*,  
533 and *ABI5* during seed germination and early seedling development. *Plant J.* 80, 654-668.
- 534 16. Min H, Zheng J, and Wang J (2014) Maize *ZmRAV1* contributes to salt and osmotic stress tolerance  
535 in transgenic *arabidopsis*. *J. Plant Biol.*
- 536 17. Xiao JL, Mo L, Ying Z, Shan H, Rong H, Yun C, et al. (2015) Overexpression of cotton *RAV1* gene  
537 in Arabidopsis confers transgenic plants high salinity and drought sensitivity. *Plos One* 10,  
538 e0118056.
- 539 18. Giri MK, Swain S, Gautam JK, Singh S, Singh N, Bhattacharjee L, et al. (2014) The Arabidopsis  
540 thaliana *At4g13040* gene, a unique member of the AP2/EREBP family, is a positive regulator  
541 for salicylic acid accumulation and basal defense against bacterial pathogens. *J. Plant Physiol.*  
542 171, 860-867.
- 543 19. Fujimoto SM, Usui A, Shinshi H, and Ohme TM (2000) Arabidopsis ethylene-responsive element  
544 binding factors act as transcriptional activators or repressors of GCC box-mediated gene  
545 expression. *Plant Cell* 12, 393-404.
- 546 20. Luis OAS, and Singh KB (2002) Identification of Arabidopsis ethylene-responsive element binding  
547 factors with distinct induction kinetics after pathogen infection. *Plant Physiol.* 128, 1313-1322.
- 548 21. Brown RL, Kemal K, Mcgrath KC, Maclean DJ, and Manners JM (2003) A role for the GCC-box  
549 in jasmonate-mediated activation of the *PDF1.2* gene of Arabidopsis. *Plant Physiol.* 132,  
550 1020-1032.
- 551 22. Yamaguchi-Shinozaki K, and Shinozaki K (1994) A novel cis-acting element in an Arabidopsis  
552 gene is involved in responsiveness to drought, low-temperature, or high-salt stress. *Plant Cell* 6,

- 553 251-264.
- 554 23. Jiang C, Iu B, and Singh J (1996) Requirement of a CCGAC *cis*-acting element for cold induction  
555 of the *BN115* gene from winter *Brassica napus*. *Plant Mol. Biol.* 30(3), 679-684.
- 556 24. Boutilier K, Offringa R, Sharma VK, Kieft H, Ouellet T, Zhang L, et al. (2002) Ectopic expression  
557 of BABY BOOM triggers a conversion from vegetative to embryonic growth. *Plant cell* 14,  
558 1737-1749.
- 559 25. Shu Y, Liu Y, Zhang J, Song, L., and Guo, C (2016) Genome-Wide Analysis of the AP2/ERF  
560 Superfamily Genes and their Responses to Abiotic Stress in *Medicago truncatula*. *Front. Plant*  
561 *Sci.* 6, 1247.
- 562 26. Zhou ML, Tang YX, and Wu YM (2012) Genome-Wide Analysis of AP2/ERF Transcription  
563 Factor Family in *Zea Mays*. *Curr. Bioinform.* 7, 324-332. DOI: 10.2174/157489312802460776
- 564 27. Zhang GC, Ming Chen X, Xu Z, Guan S, Li LC, Li A, et al. (2008) Phylogeny, gene structures, and  
565 expression patterns of the *ERF* gene family in soybean (*Glycine max* L.). *J. Exp. Bot.* 59,  
566 4095-4107.
- 567 28 . Licausi F, Giorgi FM, Zenoni S, Osti F, Pezzotti M, and Perata P (2010) Genomic and  
568 transcriptomic analysis of the *AP2/ERF* superfamily in *Vitis vinifera*. *Bmc Genomics* 11, 719.
- 569 29. Zhuang J, Cai B, Peng RH, Zhu B, Jin XF, Xue Y, et al. (2008) Genome-wide analysis of the  
570 *AP2/ERF* gene family in *Populus trichocarpa*. *Biochem. Bioph. Res. Co.* 371, 468-474.
- 571 30. Je-Hyuk L, Jung-Hun L, Yu-Mi L, Pit-Na K, and Choon-Sik J (2008) Potential analgesic and  
572 anti-inflammatory activities of *Panax ginseng* head butanolic fraction in animals. *Food Chem.*  
573 *Toxicol.* 46, 3749-3752.
- 574 31. Tao Y, Yang Y, Kwak YS, Song GG, Kim MY, Man HR, et al. (2017) Ginsenoside Rc from *Panax*

- 575 *ginseng* exerts anti-inflammatory activity by targeting TANK-binding kinase 1/interferon  
576 regulatory factor-3 and p38/ATF-2. *J. Gins. Res.* 41, 127-133.
- 577 32. Shu G, Jiang S, Mu J, Yu H, Duan H, and Deng X (2018) Antitumor immunostimulatory activity of  
578 polysaccharides from *Panax japonicus* C. A. Mey: Roles of their effects on CD4 + T cells and  
579 tumor associated macrophages. *Int. J. Biol. Macromol.* 111, 430-439.
- 580 33. Scaglione F, Ferrara F, Dugnani S, Falchi M, Santoro G, and Frascini F (1990)  
581 Immunomodulatory effects of two extracts of *Panax ginseng* C.A. Meyer. *Drug. Exp. Clin. Res.*  
582 16, 537.
- 583 34. Wang K, Jiang S, Sun C, Lin Y, Rui Y, Yi W, et al. (2015) The Spatial and Temporal  
584 Transcriptomic Landscapes of Ginseng, *Panax ginseng* C. A. Meyer. *Sci. Rep.* 5, 18283.
- 585 35. Yin R, Zhao M, Wang K, Lin Y, Wang Y, Sun C, et al. (2017) Functional differentiation and  
586 spatial-temporal co-expression networks of the *NBS*-encoding gene family in Jilin ginseng,  
587 *Panax ginseng* C.A. Meyer. *Plos One* 12, e0181596.
- 588 36. Xu J, Chu Y, Liao B, Xiao S, Yin Q, Bai R, et al. (2017) *Panax ginseng* genome examination for  
589 ginsenoside biosynthesis. *Gigascience* 6, 1-15.
- 590 37. Kim NH, Jayakodi M, Lee SC, Choi BS, Jang W, et al. (2018) Genome and evolution of the  
591 shade-requiring medicinal herb *Panax ginseng*. *Plant Biotechnol J* 16: 1904-1917.
- 592 38. Kang KB, Jayakodi M, Yun SL, Nguyen VB, Park HS, Koo HJ, et al. (2018). Identification of  
593 candidate UDP-glycosyltransferases involved in protopanaxadiol-type ginsenoside biosynthesis  
594 in *Panax ginseng*. *Sci. Rep.* 8, 11744.
- 595 39. Thompson JD, Higgins DG, and Gibson TJ (1994) CLUSTAL W: improving the sensitivity of  
596 progressive multiple sequence alignment through sequence weighting, position-specific gap

- 597 penalties and weight matrix choice. *Nucleic Acids Res.* 22, 4673-4680.
- 598 40. Tamura K, Peterson D, Peterson N, Stecher G, Nei M, and Kumar S (2011) MEGA5: Molecular  
599 Evolutionary Genetics Analysis Using Maximum Likelihood, Evolutionary Distance, and  
600 Maximum Parsimony Methods. *Mol. Biol. Evol.* 28, 2731-2739.
- 601 41. Bailey TL, Nadya W, Chris M, and Li WW (2006) MEME: discovering and analyzing DNA and  
602 protein sequence motifs. *Nucleic Acids Res.* 34, 369-373.
- 603 42. Athanasios T, Stjin VD, Enright AJ, and Freeman TC (2009) Network visualization and analysis of  
604 gene expression data using BioLayout Express<sup>3D</sup>. *Nat. Protoc.* 4, 1535-1550.
- 605 43. Livak KJ, Schmittgen TD (2001) Analysis of relative gene expression data using real-time  
606 quantitative PCR and the 2(-Delta Delta C(T)) Method. *Methods* 25: 402-408.
- 607 44. Xu W, Li F, Ling L, and Liu A (2013) Genome-wide survey and expression profiles of the  
608 AP2/ERF family in castor bean (*Ricinus communis* L.). *BMC Genomics* 14, 785.
- 609 45. Ana C, Stefan GT, Juan Miguel GG, Javier T, Manuel T, and Montserrat R (2005) Blast2GO: a  
610 universal tool for annotation, visualization and analysis in functional genomics research.  
611 *Bioinformatics* 21, 3674-3676.
- 612 46. Zhuang J, Chen JM, Yao QH, Xiong F, Sun CC, Zhou XR, et al. (2011) Discovery and expression  
613 profile analysis of AP2/ERF family genes from *Triticum aestivum*. *Mol. Biol. Rep.* 38, 745-753.
- 614 47. Hu L, and Liu S (2011) Genome-wide identification and phylogenetic analysis of the ERF gene  
615 family in cucumbers. *Genet. Mol. Biol.* 34(4), 624-633.
- 616 48. Duan C, Argout X, Gébelin V, Summo M, Dufayard JF, Leclercq J, et al. (2013) Identification of  
617 the *Hevea brasiliensis* AP2/ERF superfamily by RNA sequencing. *BMC Genomics* 14, 30.
- 618 49. Zhang M, Wu YH, Lee MK, Liu YH, Rong Y, Santos TS, et al. (2010) Numbers of genes in the

- 619 NBS and RLK families vary by more than four-fold within a plant species and are regulated by  
620 multiple factors. *Nucleic Acids Res.* 38, 6513-6525.
- 621 50. Kizis D, Lumbreras V, and Pagès M (2001) Role of AP2/EREBP transcription factors in gene  
622 regulation during abiotic stress. *Febs Lett.* 498, 187-189.
- 623 51. Li X, Zhang D, Gao B, Liang Y, Yang H, Wang Y, et al. (2017) Transcriptome-Wide Identification,  
624 Classification, and Characterization of *AP2/ERF* Family Genes in the Desert Moss *Syntrichia*  
625 *caninervis*. *Front. Plant Sci.* 8, 262.
- 626 52. Carvalho RF, Feijão CV, and Duque P (2013) On the physiological significance of alternative  
627 splicing events in higher plants. *Protoplasma* 250, 639-650.
- 628 53. Lin, Y., Wang, K., Li, X., Sun, C., Yin, R., Wang, Y., and Zhang, M (2018) Evolution, functional  
629 differentiation, and co-expression of the *RLK* gene family revealed in Jilin ginseng, *Panax*  
630 *ginseng* C.A. Meyer. *Mol. Genet. Genomics* 293, 845-859.
- 631 54. Wang Y, Li X, Lin Y, Wang Y, Wang K, Sun C, et al. (2018) Structural Variation, Functional  
632 Differentiation, and Activity Correlation of the Cytochrome P450 Gene Superfamily Revealed  
633 in Ginseng. *The Plant Genome* 11, 1-11.
- 634 55. Mizoi J, Shinozaki K, and Yamaguchi-Shinozaki K (2012) AP2/ERF family transcription factors in  
635 plant abiotic stress responses. *BBA - Gene Regul. Mech.* 1819, 86-96.
- 636 56. Guodong R, Jinkai S, Yanfei Z, Caiyun H, and Jianguo Z (2015) Genome-wide analysis of the  
637 *AP2/ERF* gene family in *Salix arbutifolia*. *Febs Open Bio.* 5, 132-137.
- 638 57. Liu Q, Kasuga M, Sakuma Y, Abe H, Miura S, Yamaguchi-Shinozaki K, and Shinozaki K (1998)  
639 Two transcription factors, *DREB1* and *DREB2*, with an EREBP/AP2 DNA binding domain  
640 separate two cellular signal transduction pathways in drought- and low-temperature-responsive

- 641 gene expression, respectively, in Arabidopsis. *Plant Cell* 10, 1391-1406.
- 642 58. Park S, Lee C-M, Doherty CJ, Gilmour SJ, Kim Y, Thomashow MF (2015) Regulation of the  
643 Arabidopsis CBF regulon by a complex low-temperature regulatory network. *Plant Journal* 82:  
644 193-207.
- 645 59. Jaglo-Ottosen RK (1998) Arabidopsis CBF1 Overexpression Induces COR Genes and Enhances  
646 Freezing Tolerance. *Science* 280: 104-106.
- 647 60. Oscar L, Raquel P, Sánchez-Serrano JJ, and Roberto S (2003) ETHYLENE RESPONSE  
648 FACTOR1 integrates signals from ethylene and jasmonate pathways in plant defense. *Plant*  
649 *Cell* 15, 165-178.
- 650 61. Zarei A, Körbes AP, Younessi P, Montiel G, Champion A, and Memelink J (2011) Two GCC  
651 boxes and AP2/ERF-domain transcription factor *ORA59* in jasmonate/ethylene-mediated  
652 activation of the *PDF1.2* promoter in Arabidopsis. *Plant Mol. Biol.* 75, 321-331.
- 653 62. Moffat CS, Ingle RA, Wathugala DL, Saunders NJ, Knight H, and Knight MR (2012) ERF5 and  
654 ERF6 Play Redundant Roles as Positive Regulators of JA/Et-Mediated Defense against *Botrytis*  
655 *cinerea* in Arabidopsis. *PLOS ONE*.
- 656 63. Benevenuto RF, Seldal T, Hegland SJ, Rodriguez-Saona C, Kawash J, and Polashock J (2019)  
657 Transcriptional profiling of methyl jasmonate-induced defense responses in bilberry (*Vaccinium*  
658 *myrtillus* L.). *BMC Plant Biol.* 19, 70.
- 659 64. Chen H, Jones AD, and Howe GA (2006) Constitutive activation of the jasmonate signaling  
660 pathway enhances the production of secondary metabolites in tomato. *Febs Lett.* 580,  
661 2540-2546.
- 662 65. Hyun-Jin K, Feng C, Xi W, and Rajapakse NC (2006) Effect of methyl jasmonate on secondary

- 663 metabolites of sweet basil (*Ocimum basilicum* L.). *J. Agric. Food. Chem.* 54(6), 2327-2332.
- 664 66. Wang H, Ma C, Li Z, Ma L, Hong W, Ye H, et al. (2010) Effects of exogenous methyl jasmonate  
665 on artemisinin biosynthesis and secondary metabolites in *Artemisia annua* L. *Ind. Crop. Prod.*  
666 31, 214-218.
- 667 67. Kim YS, Hahn EJ, Murthy HN, and Paek KY (2004) Adventitious root growth and ginsenoside  
668 accumulation in *Panax ginseng* cultures as affected by methyl jasmonate. *Biotechnol. lett.* 26,  
669 1619-1622.
- 670 68. Kim YJ, Zhang D, and Yang DC (2015) Biosynthesis and biotechnological production of  
671 ginsenosides. *Biotechnol. Adv.* 33, 717-735.

672

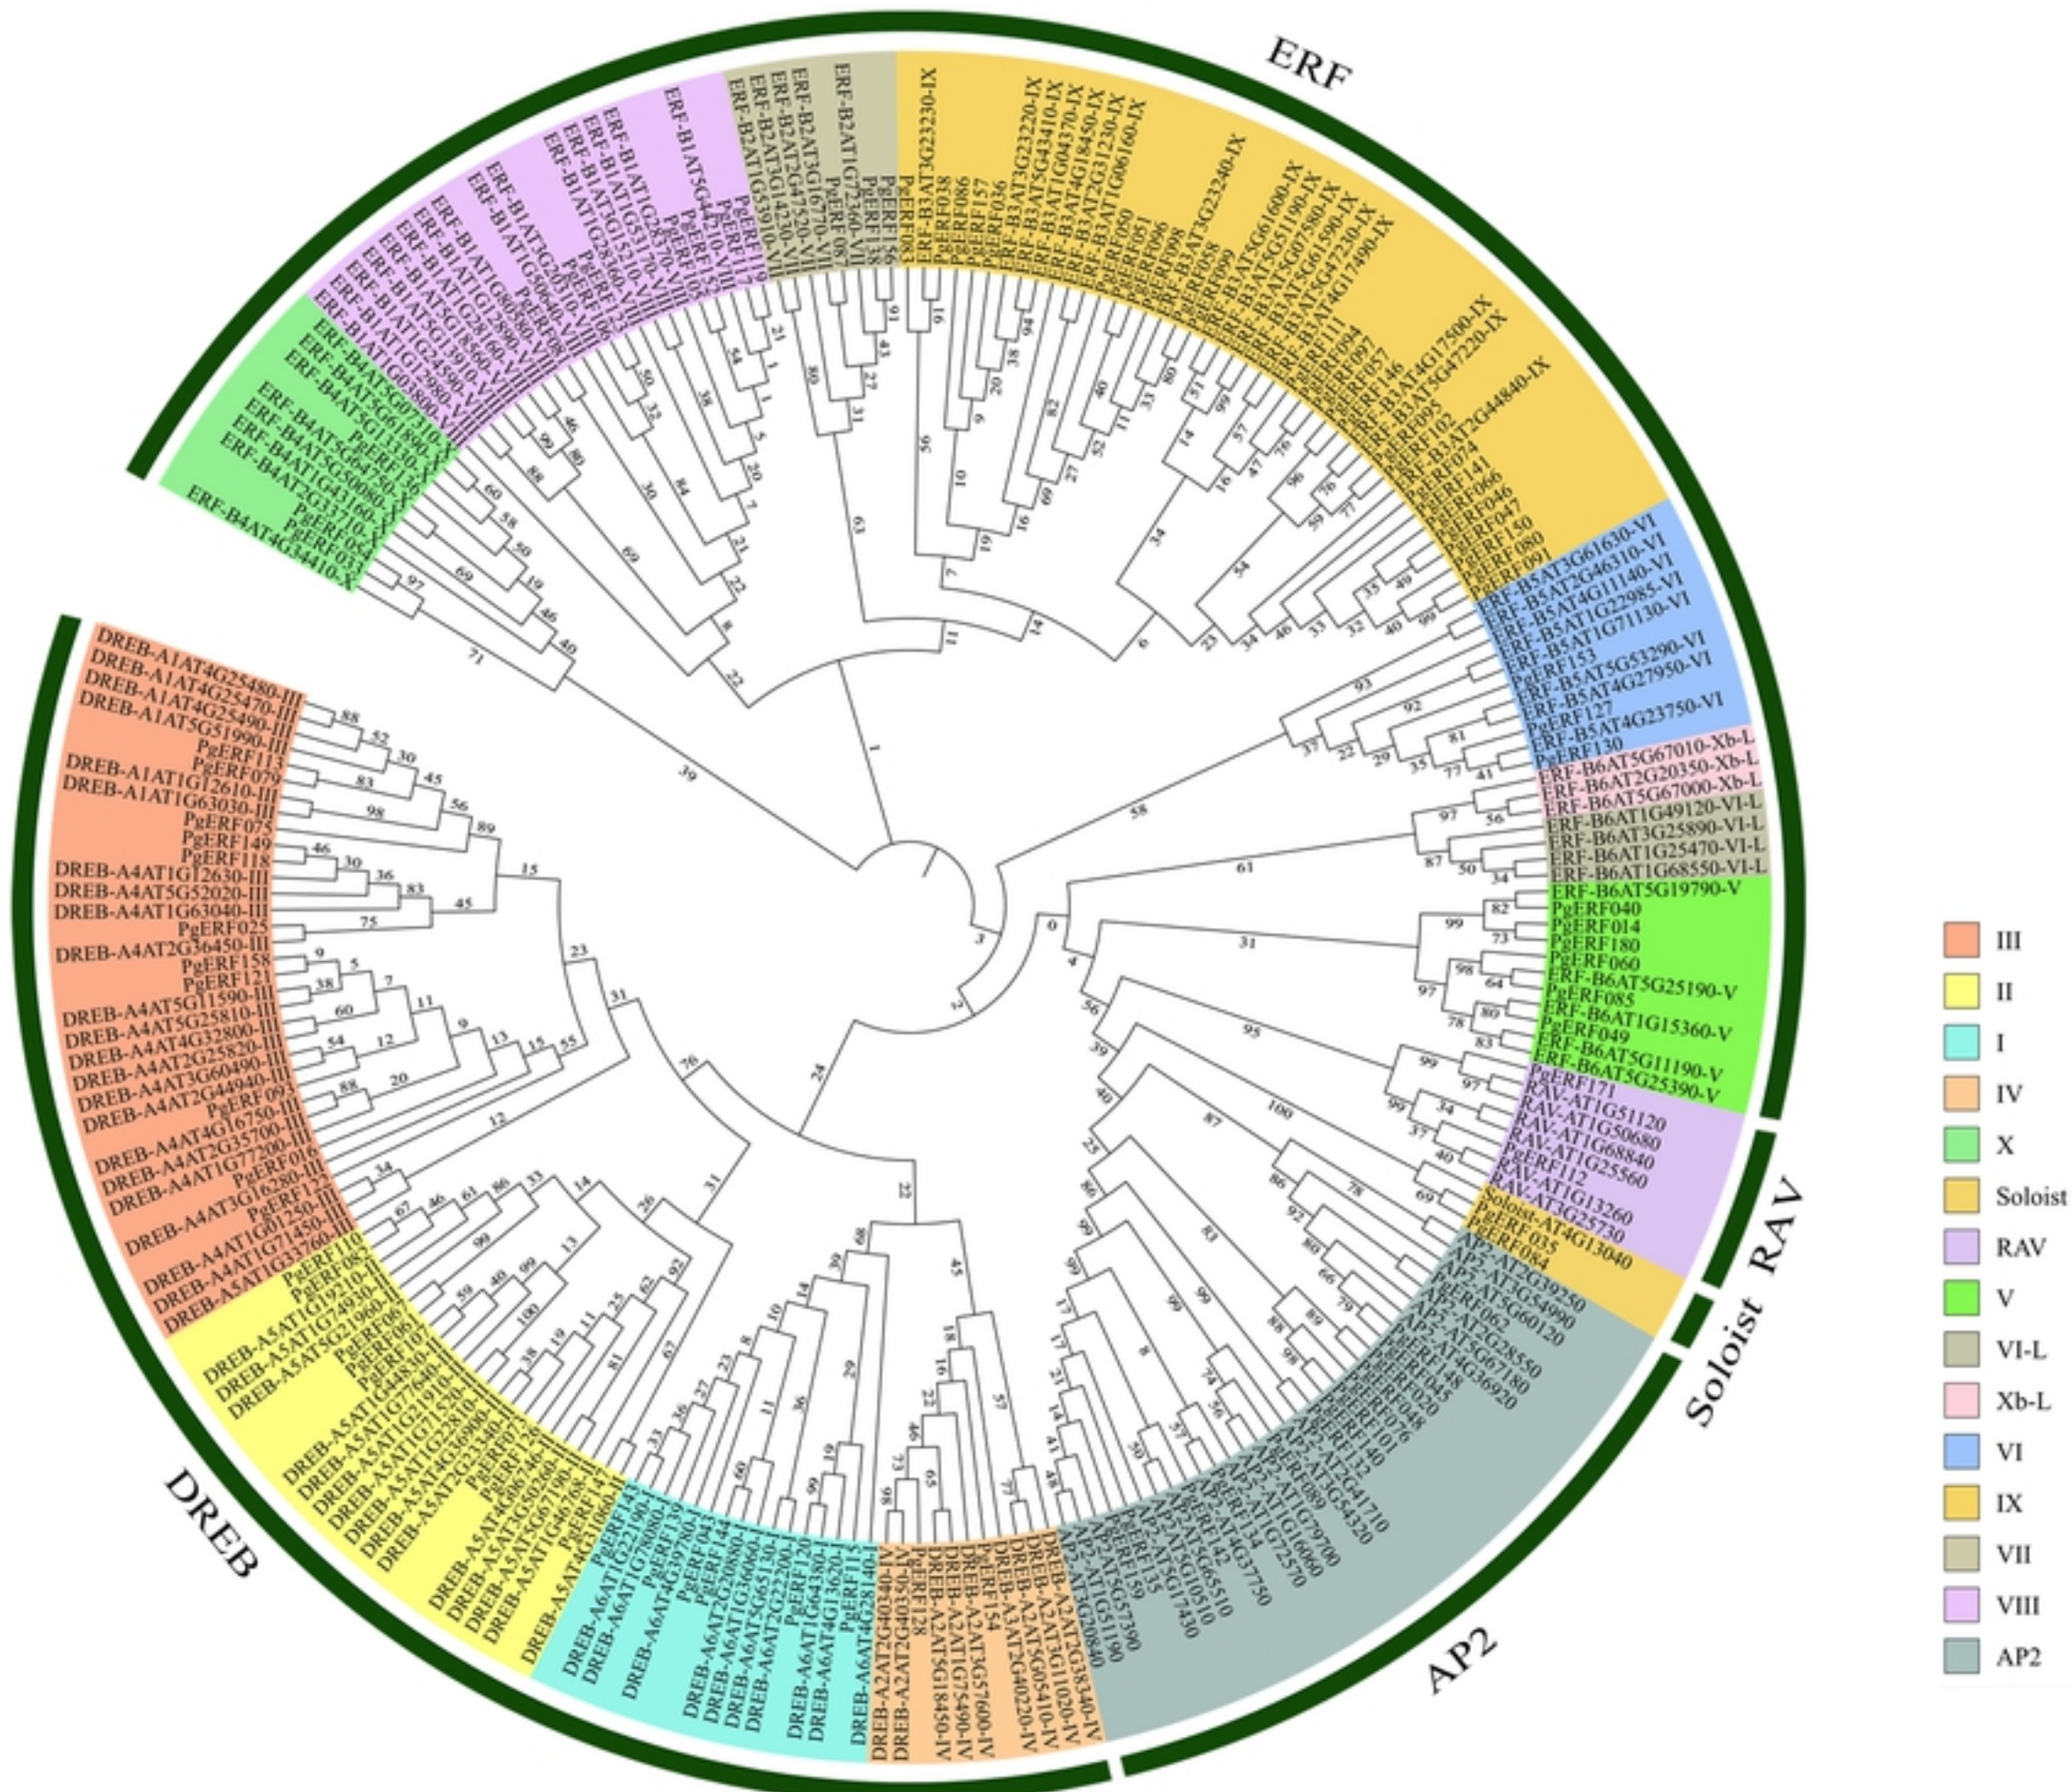

Figure 1



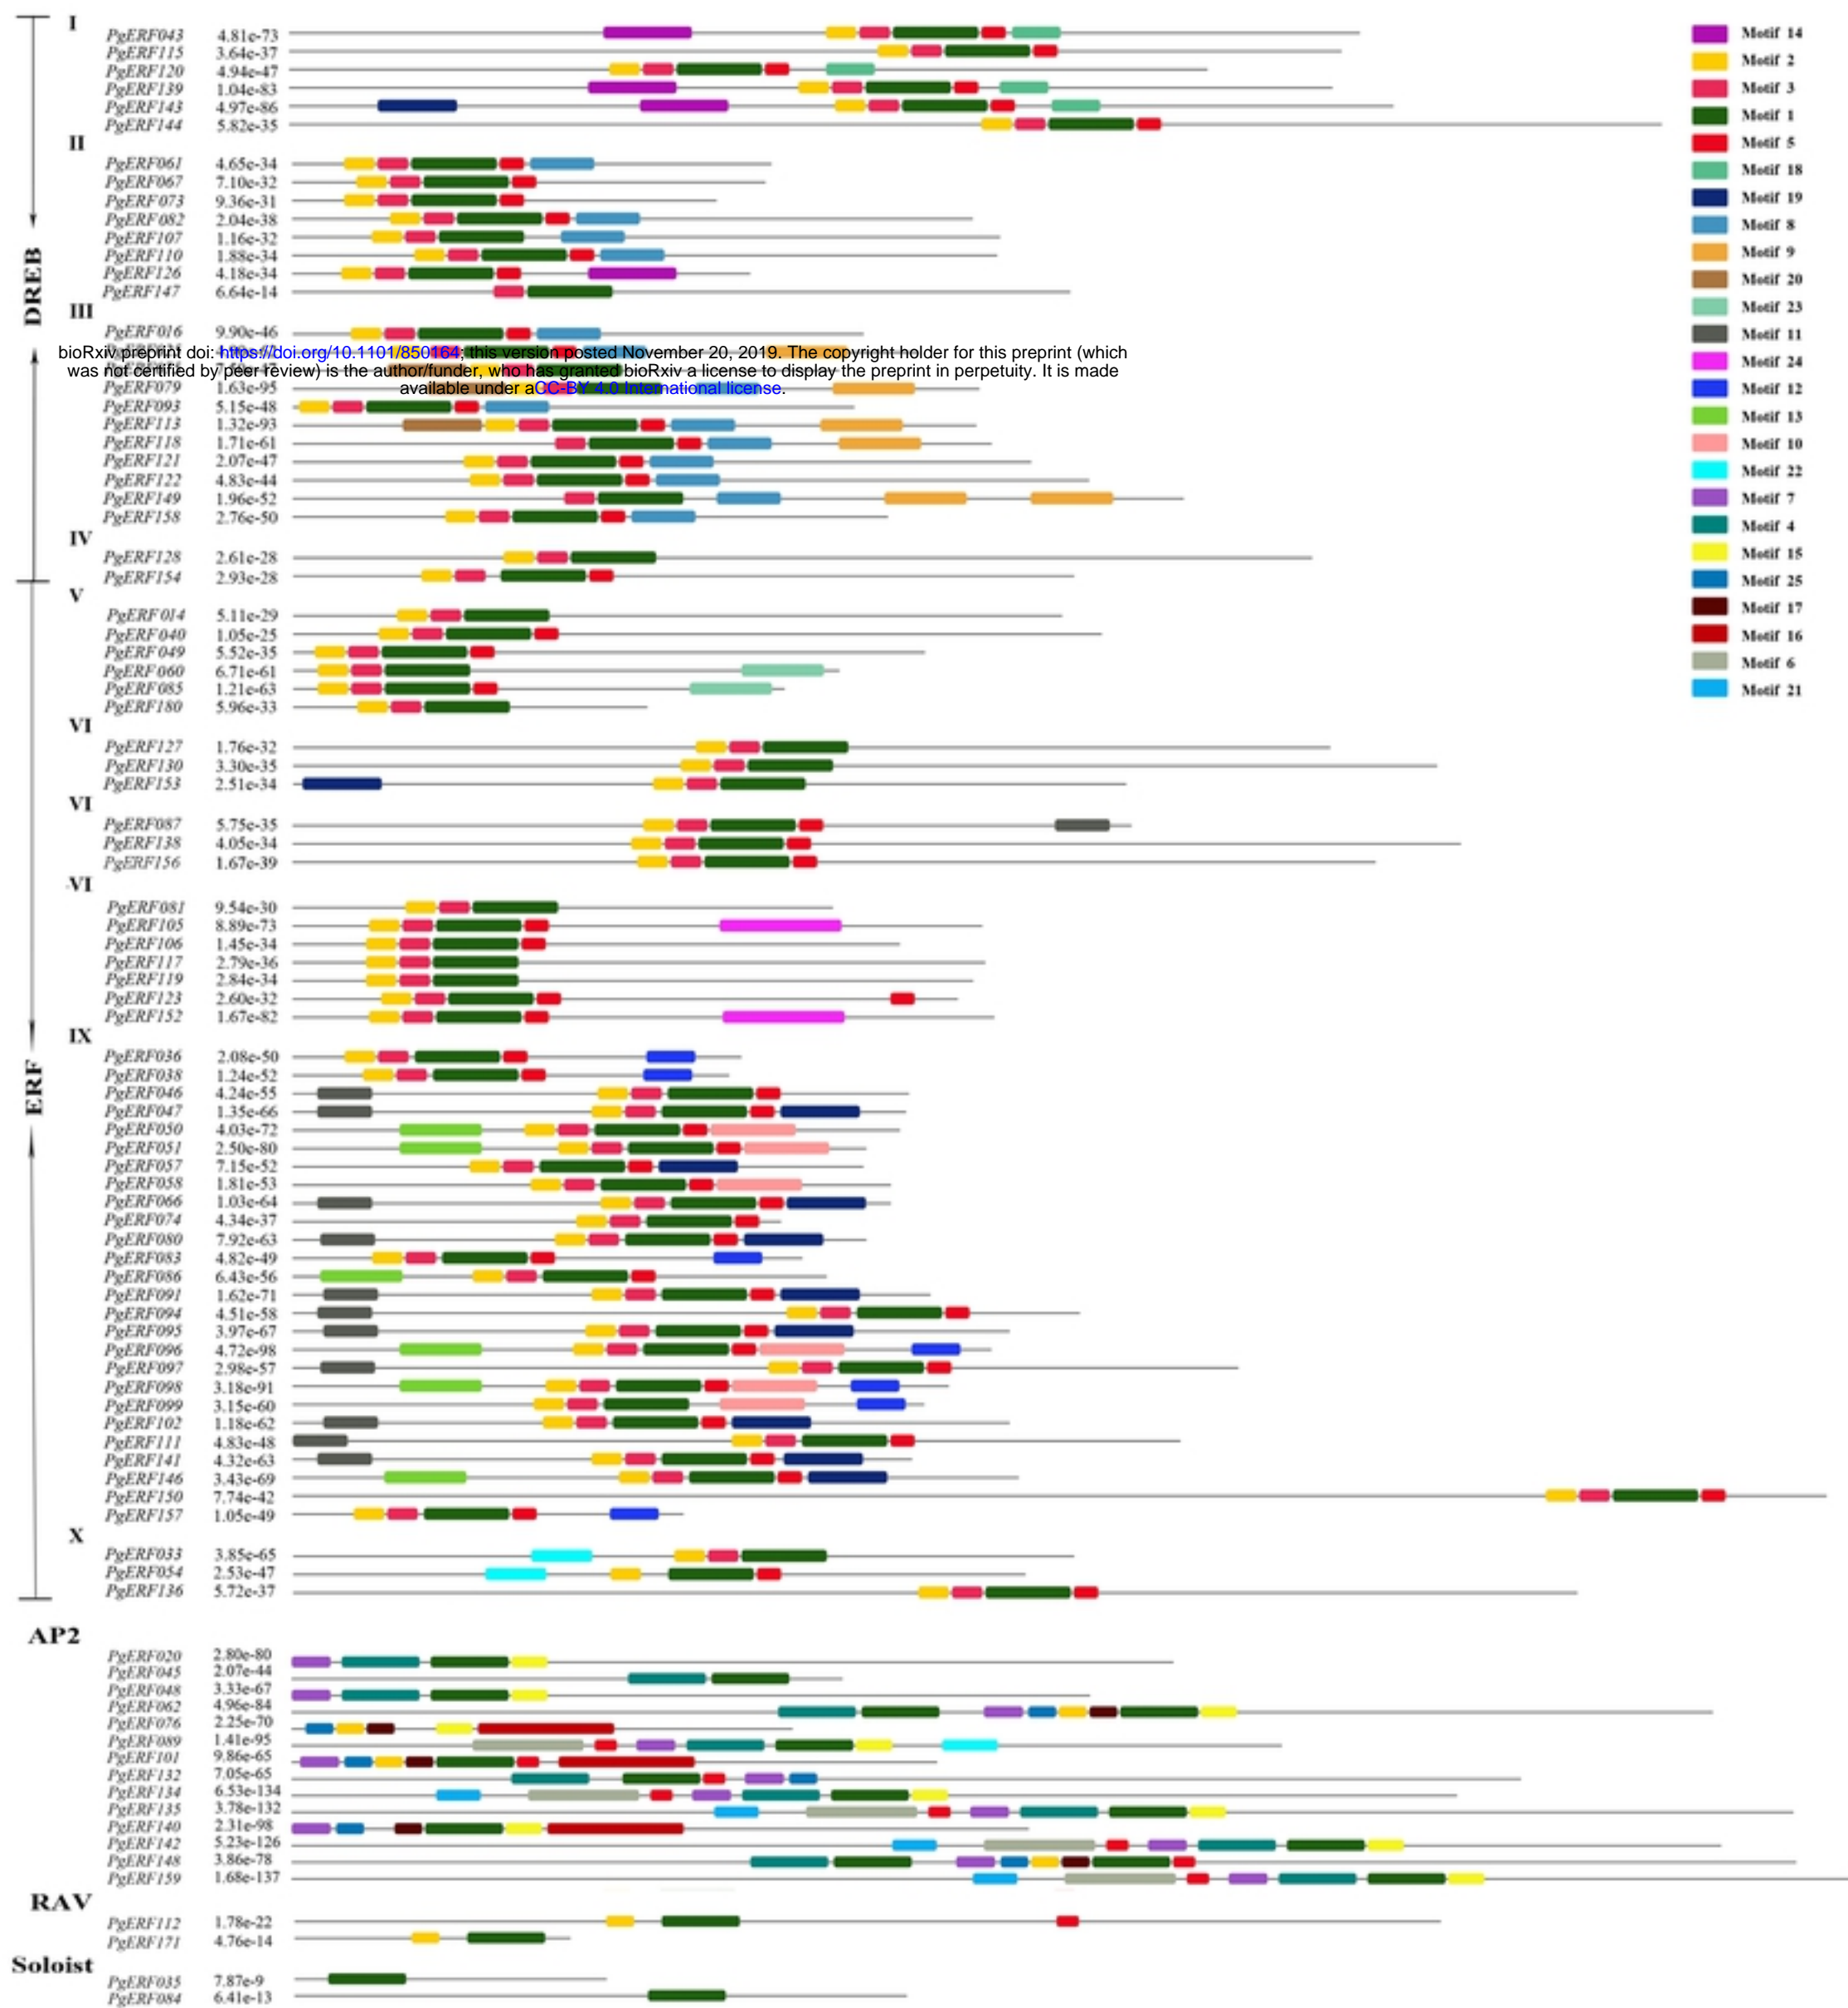

Figure 2

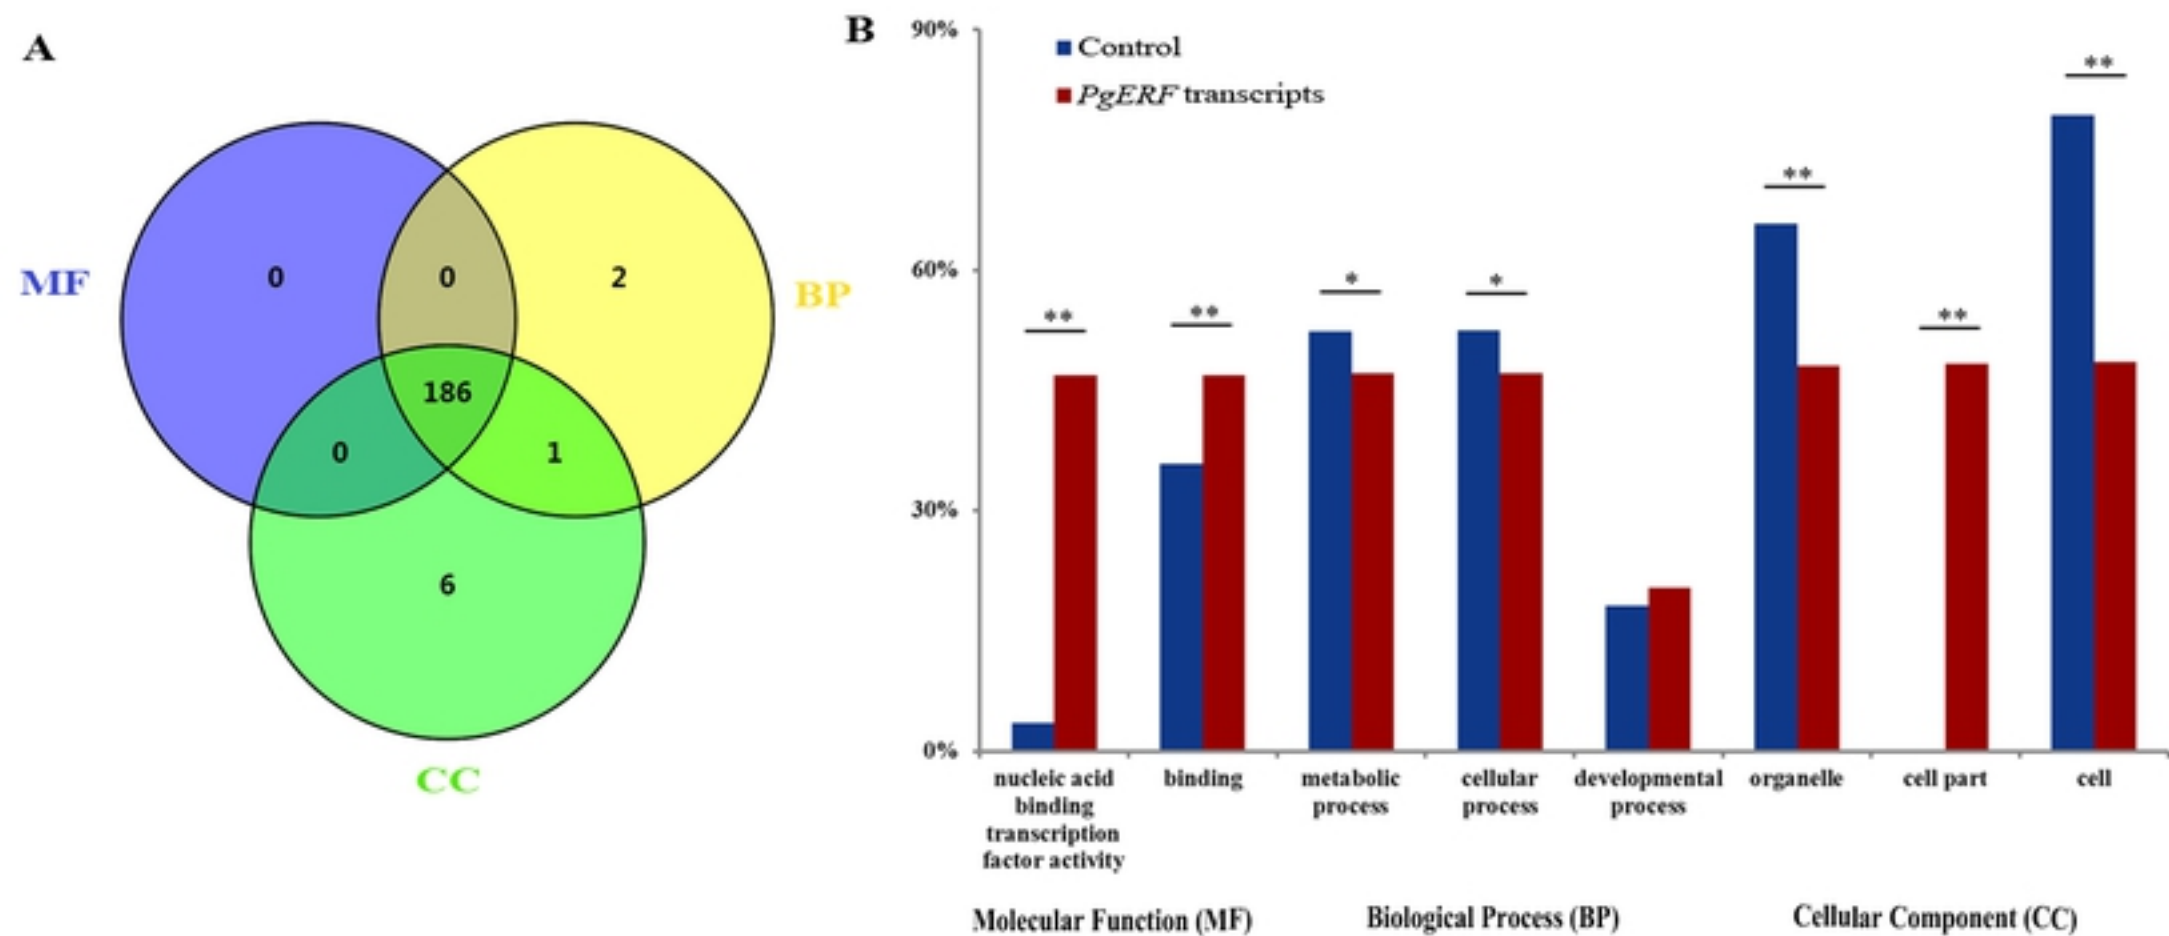

Figure 3

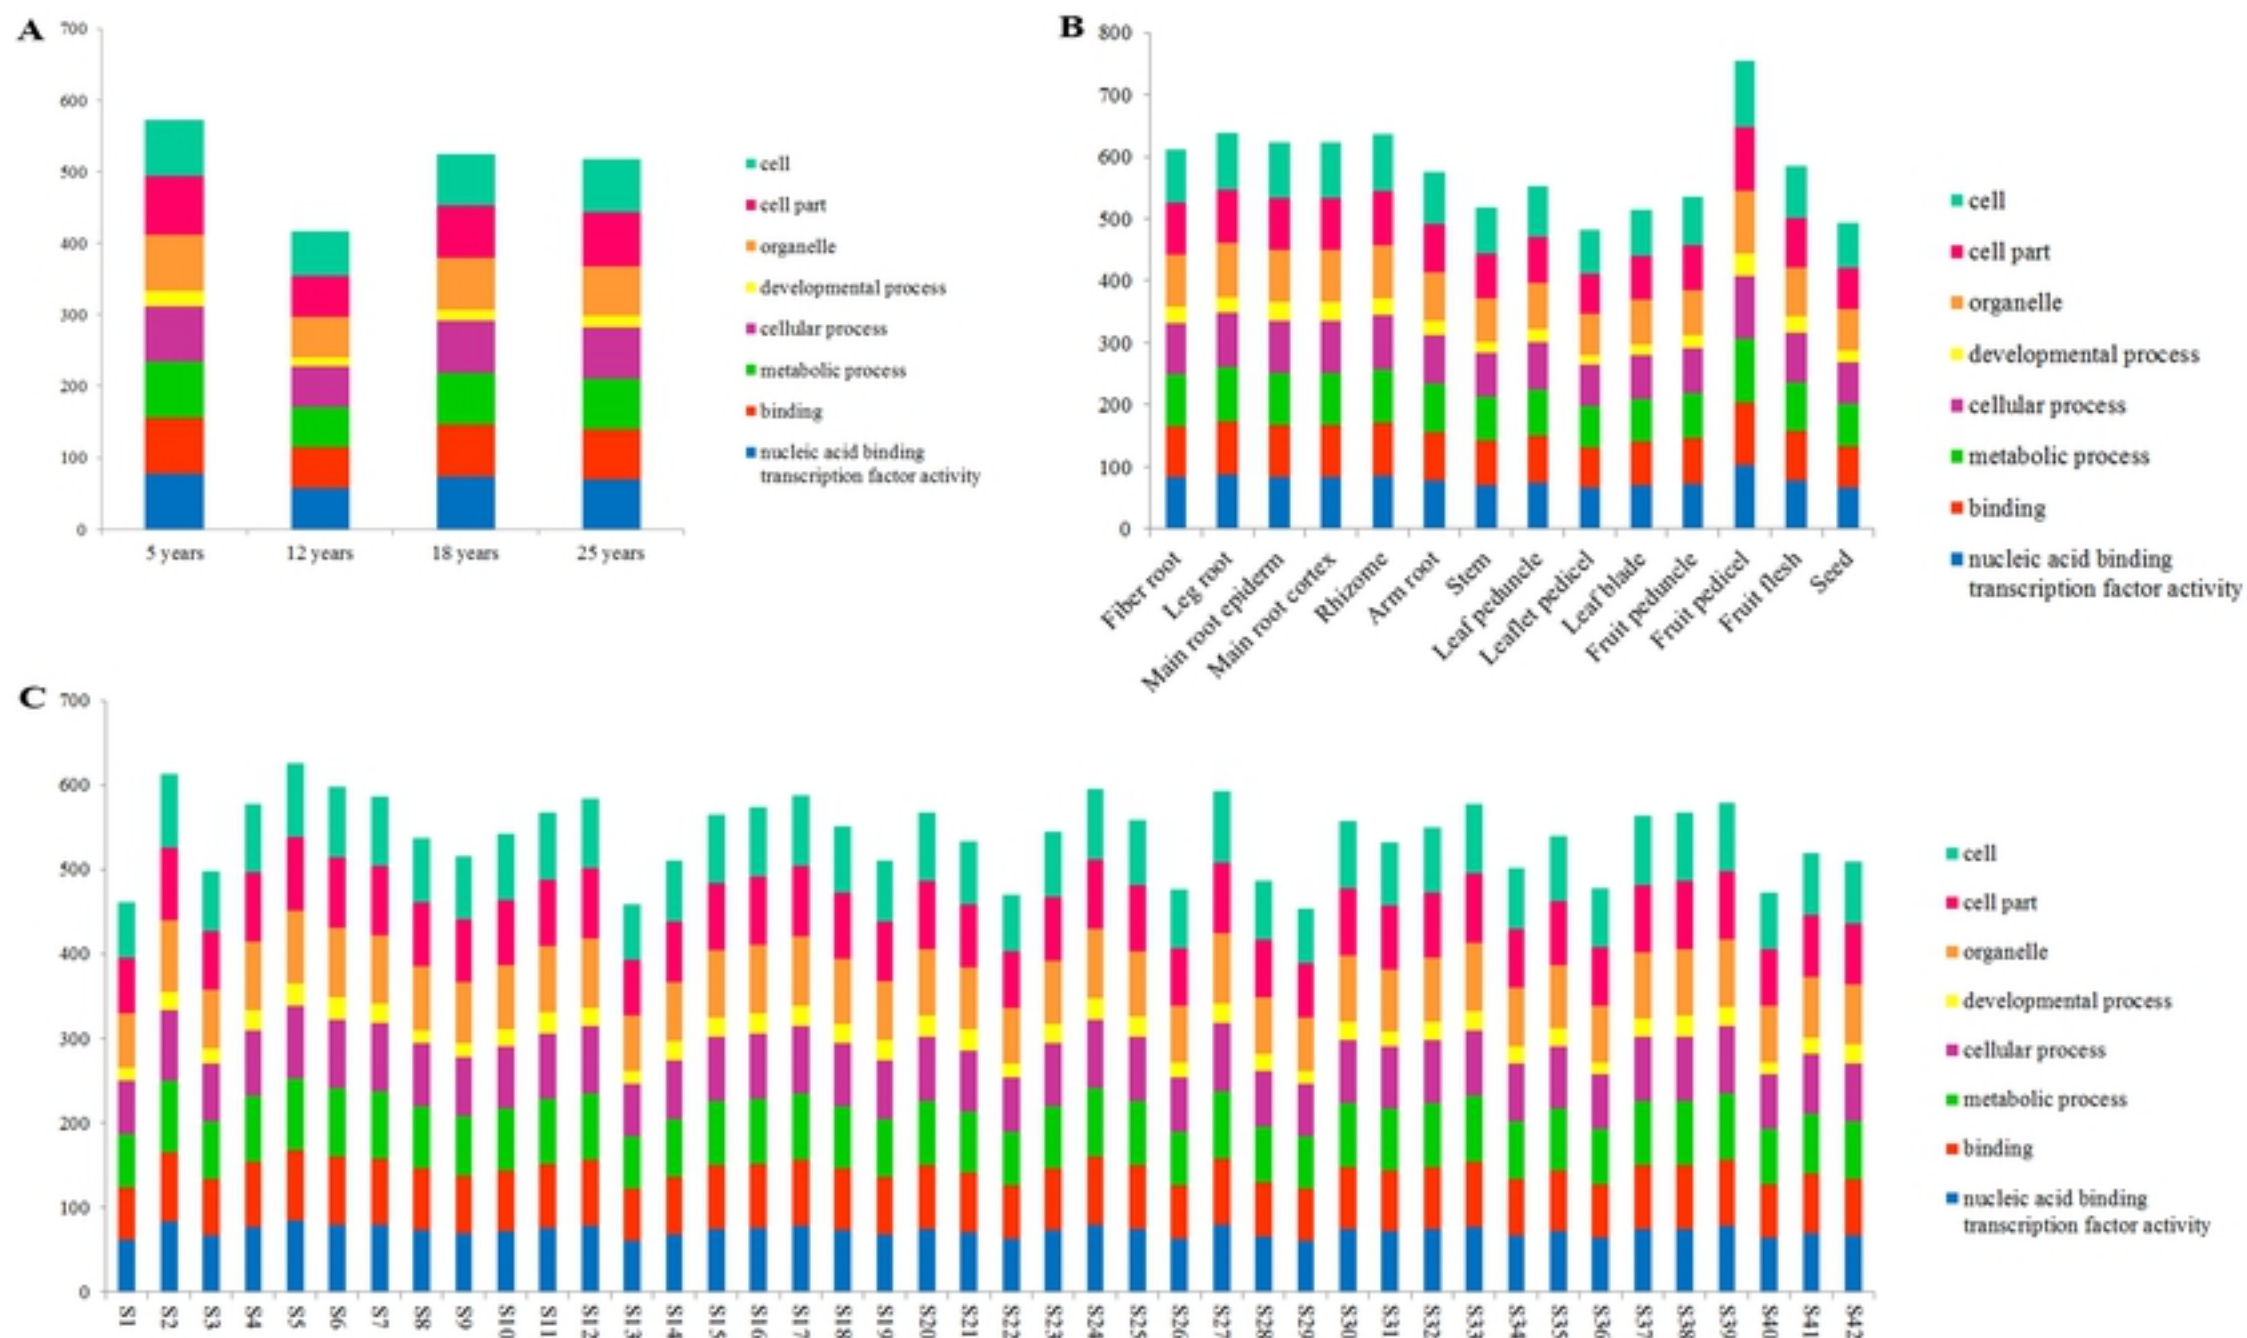

Figure 4

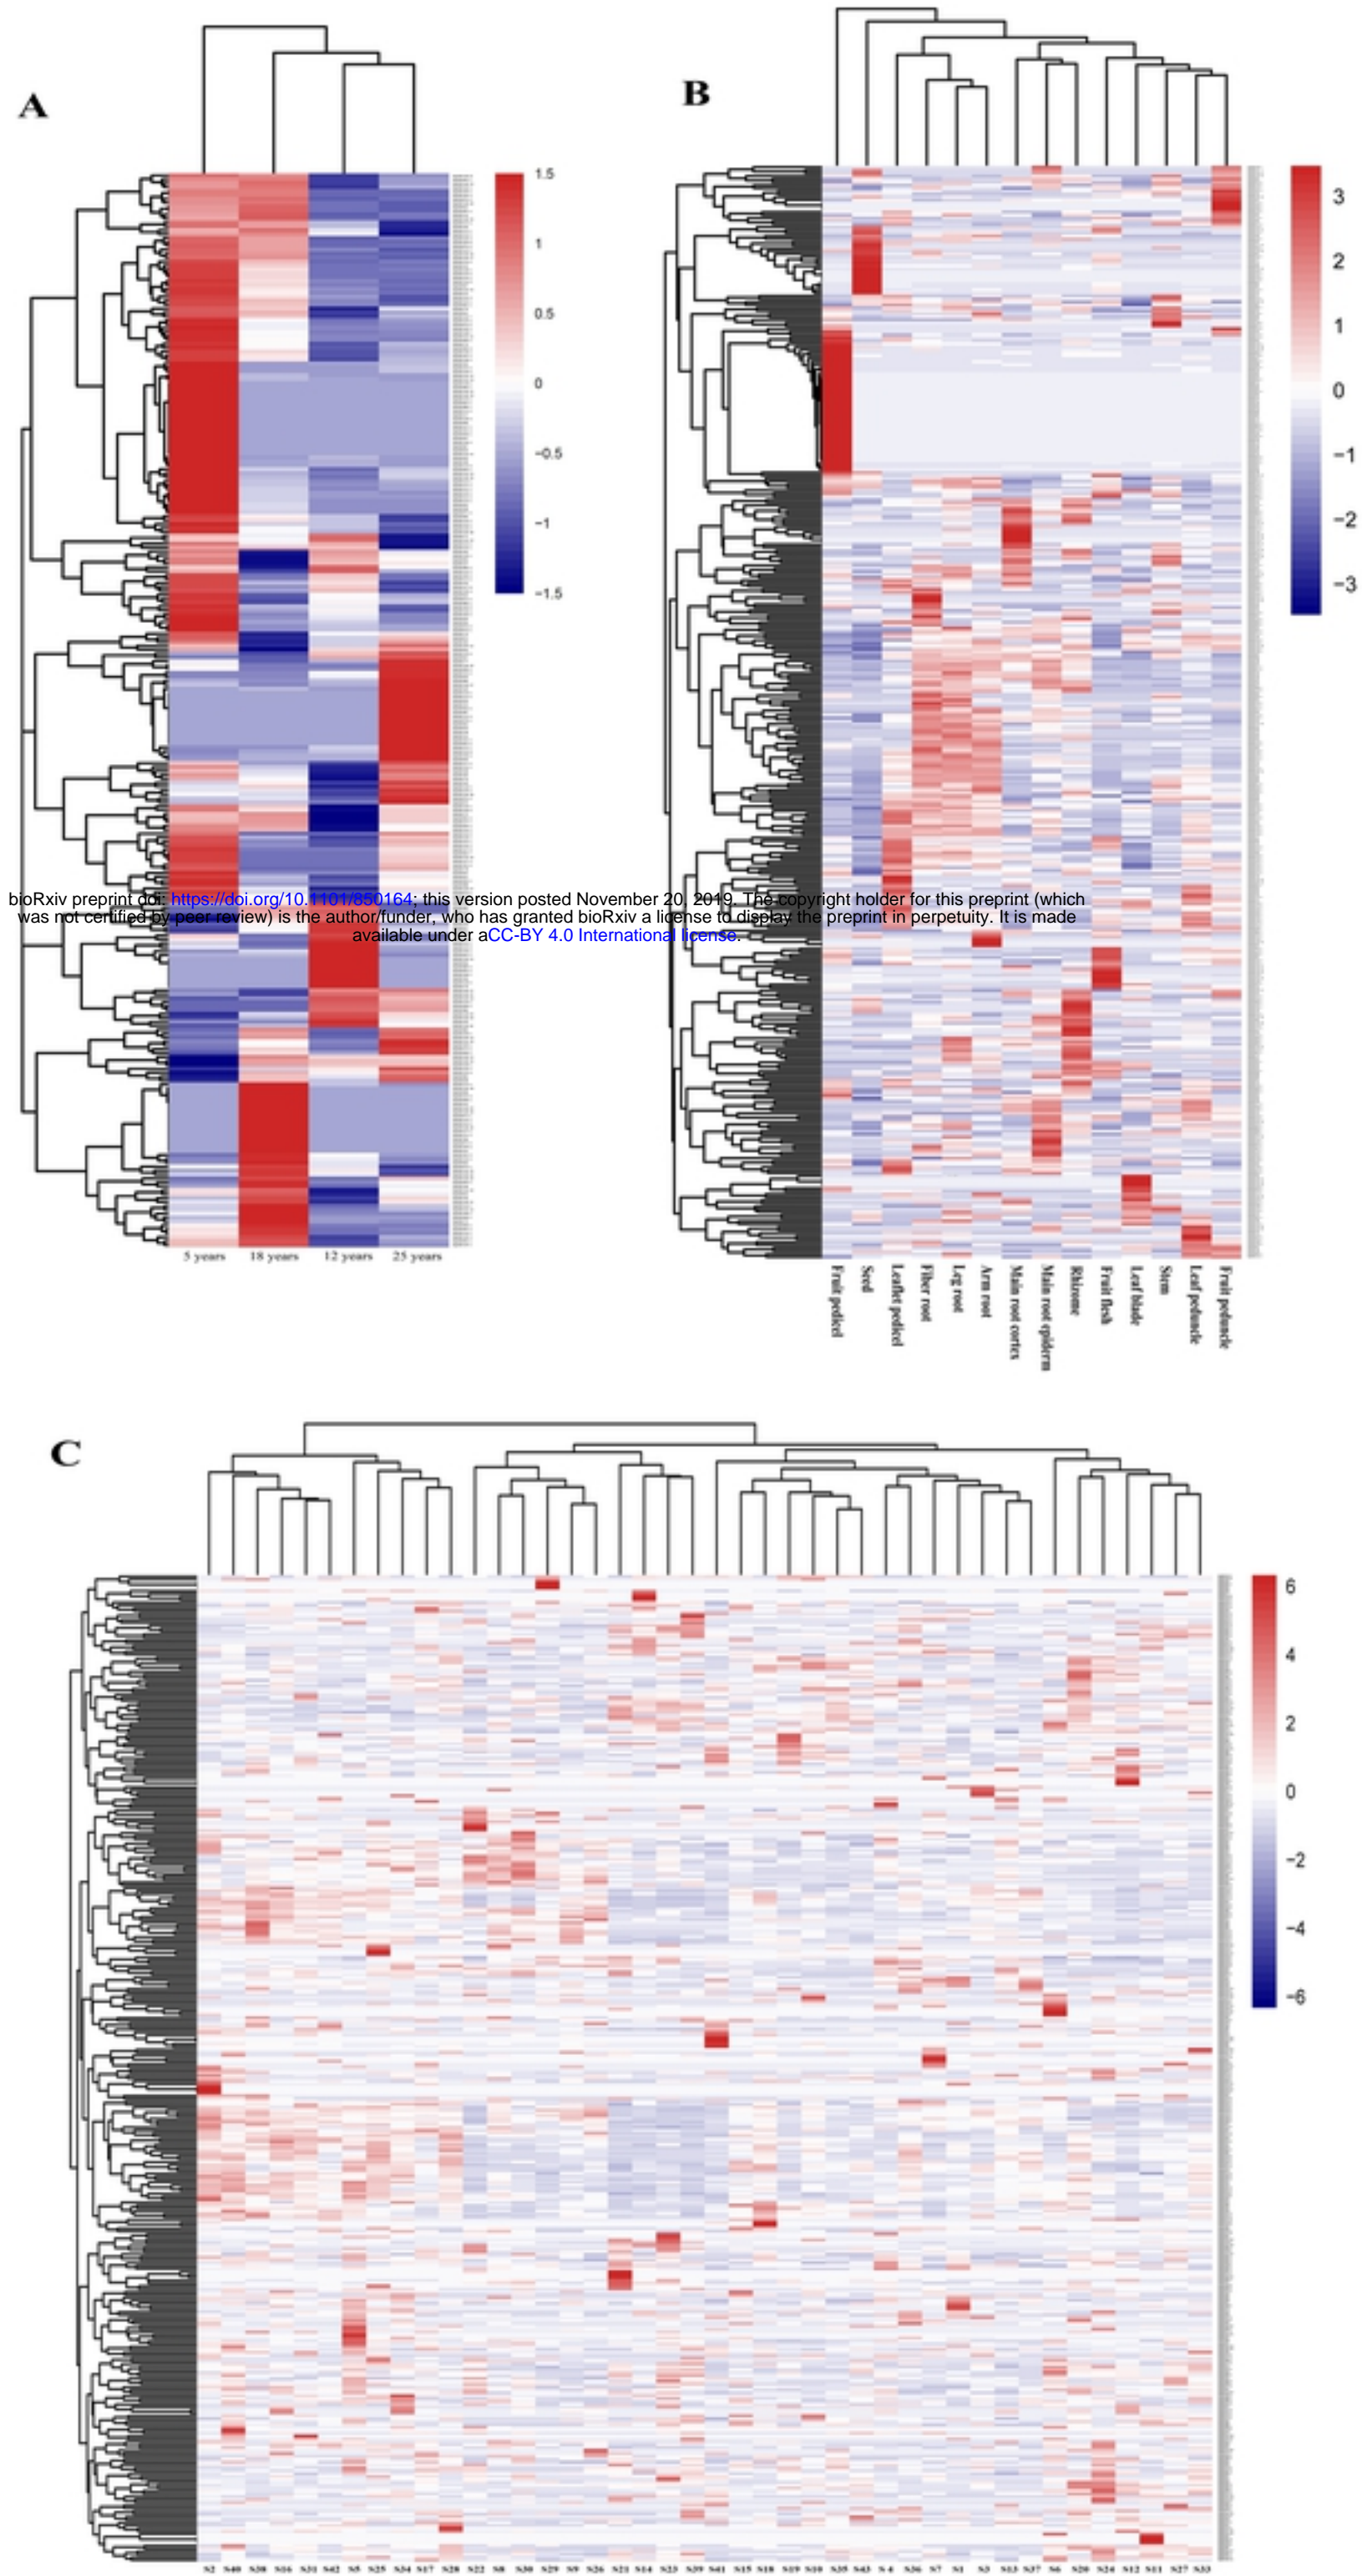

Figure 5

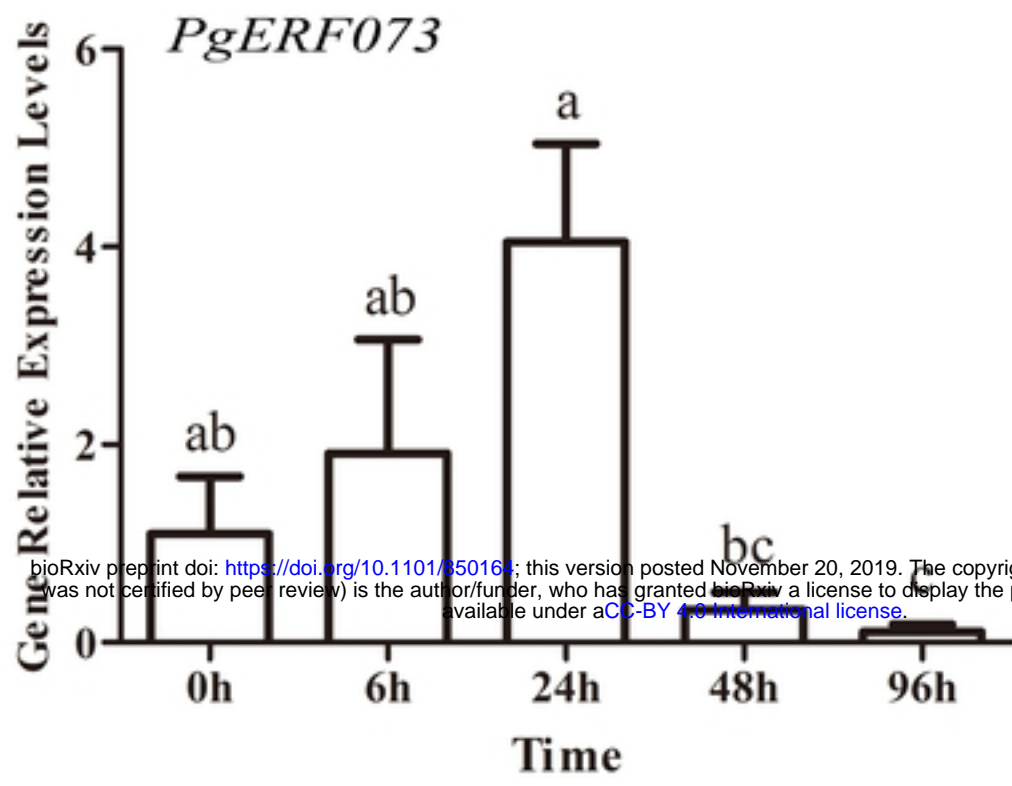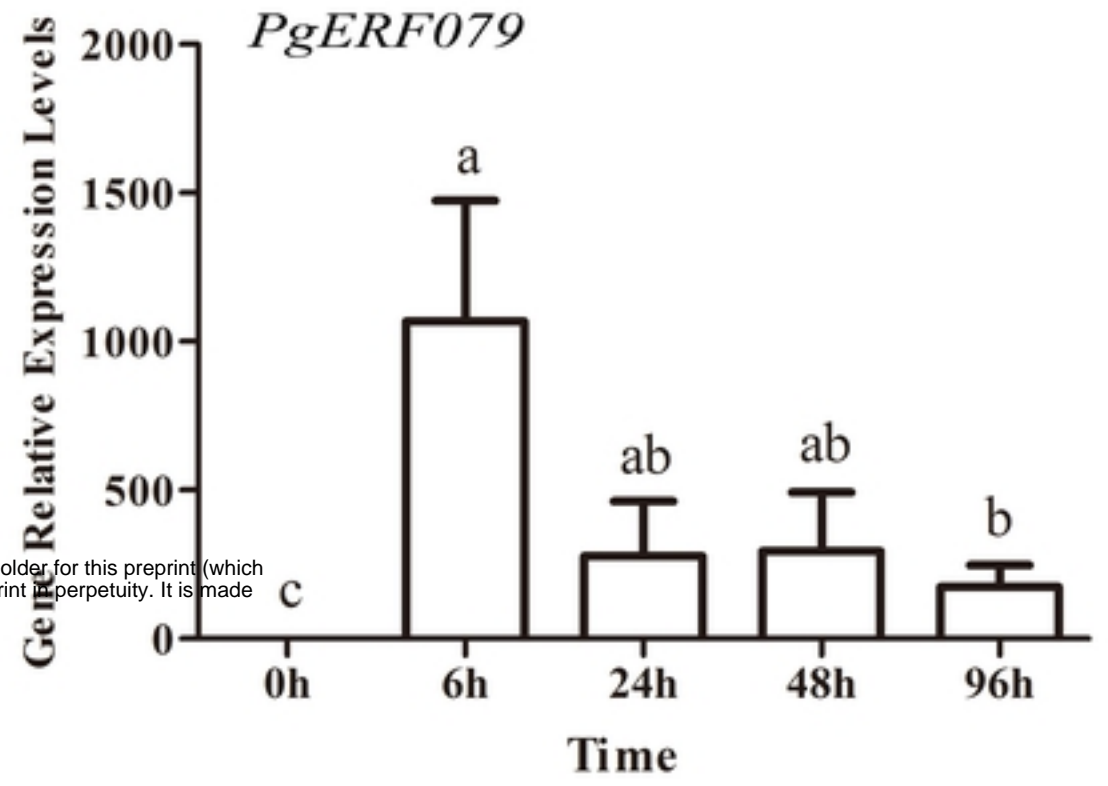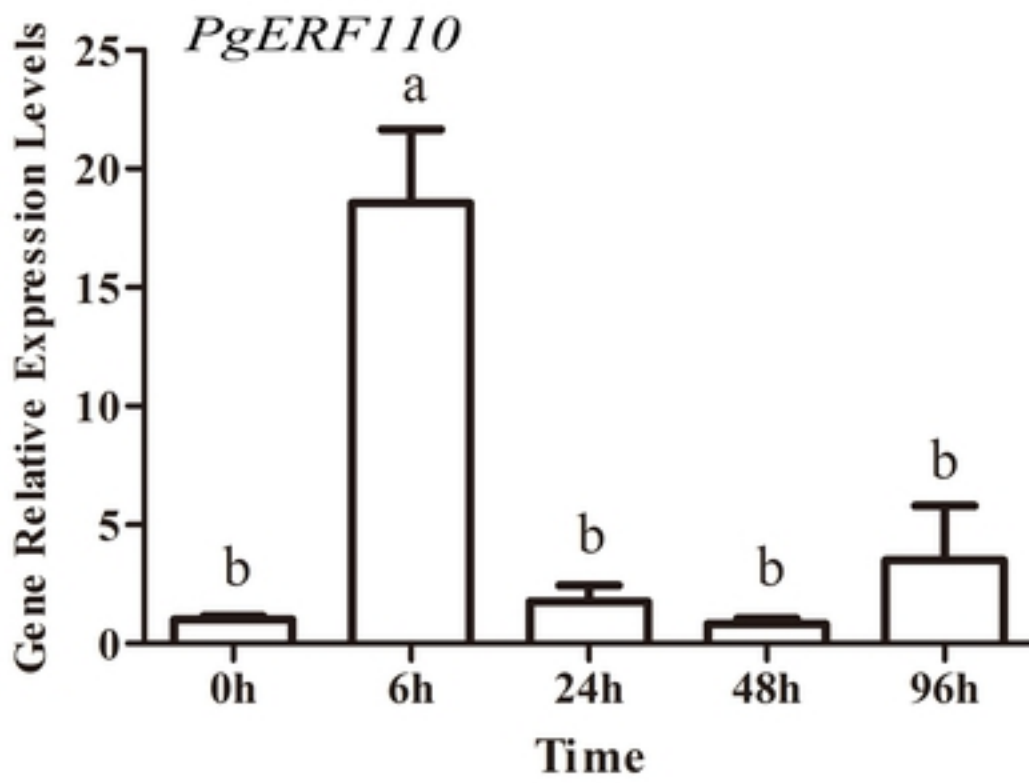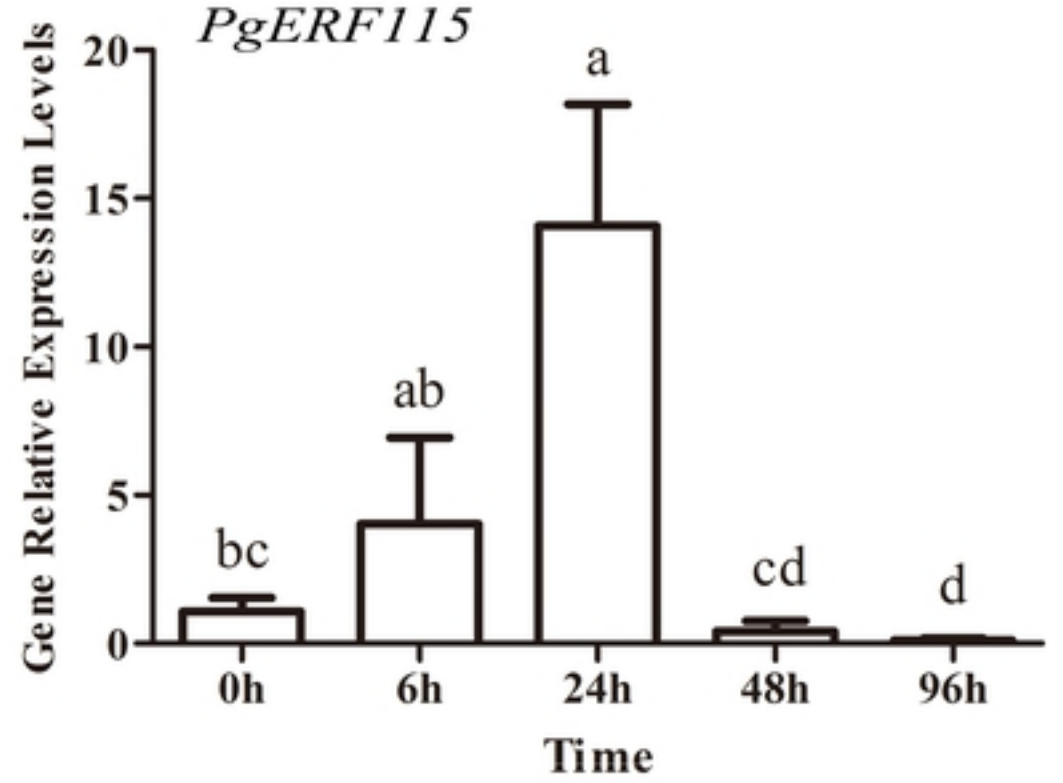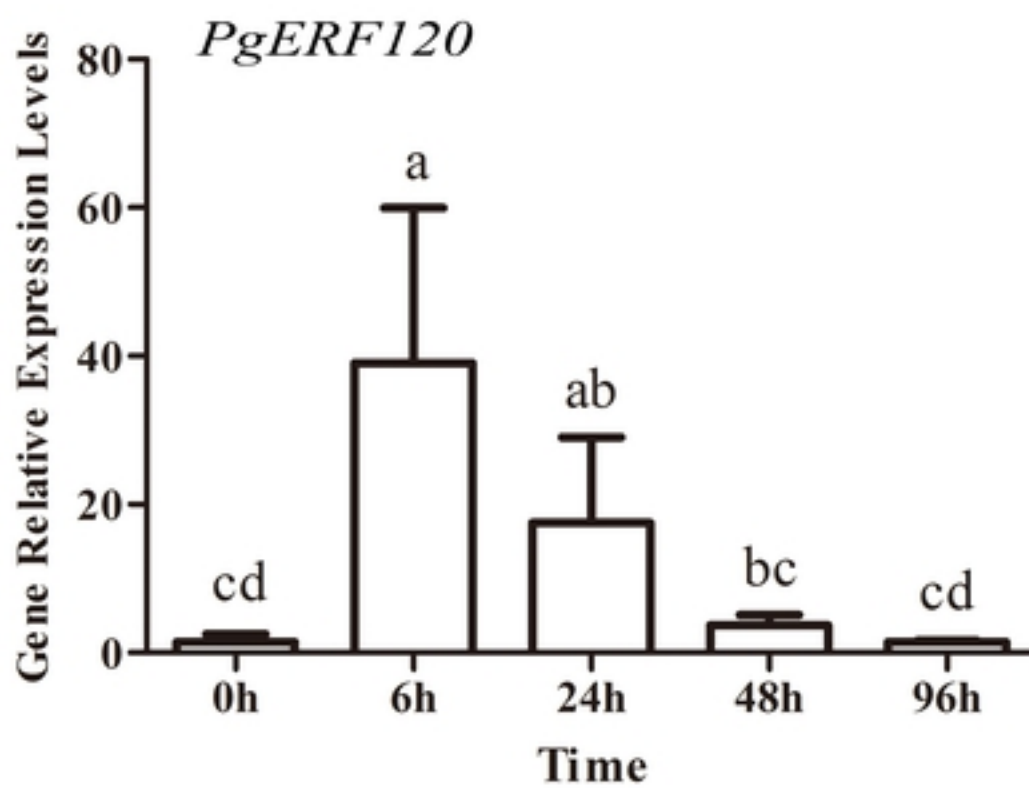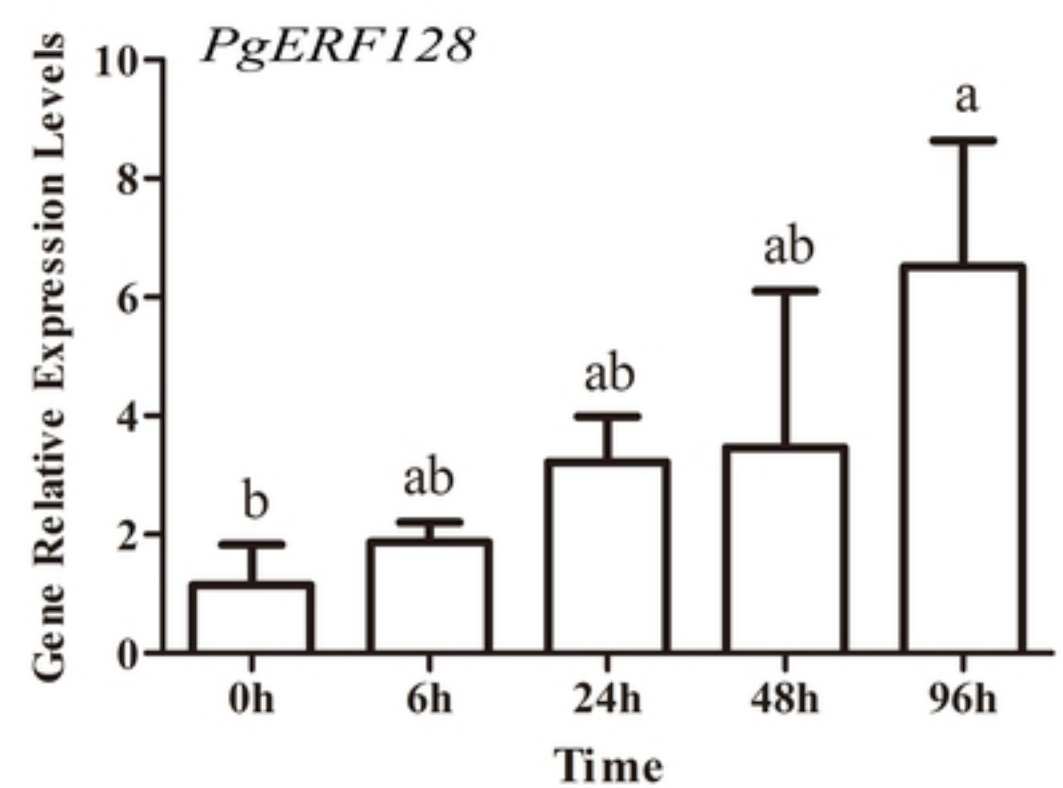

Figure 7

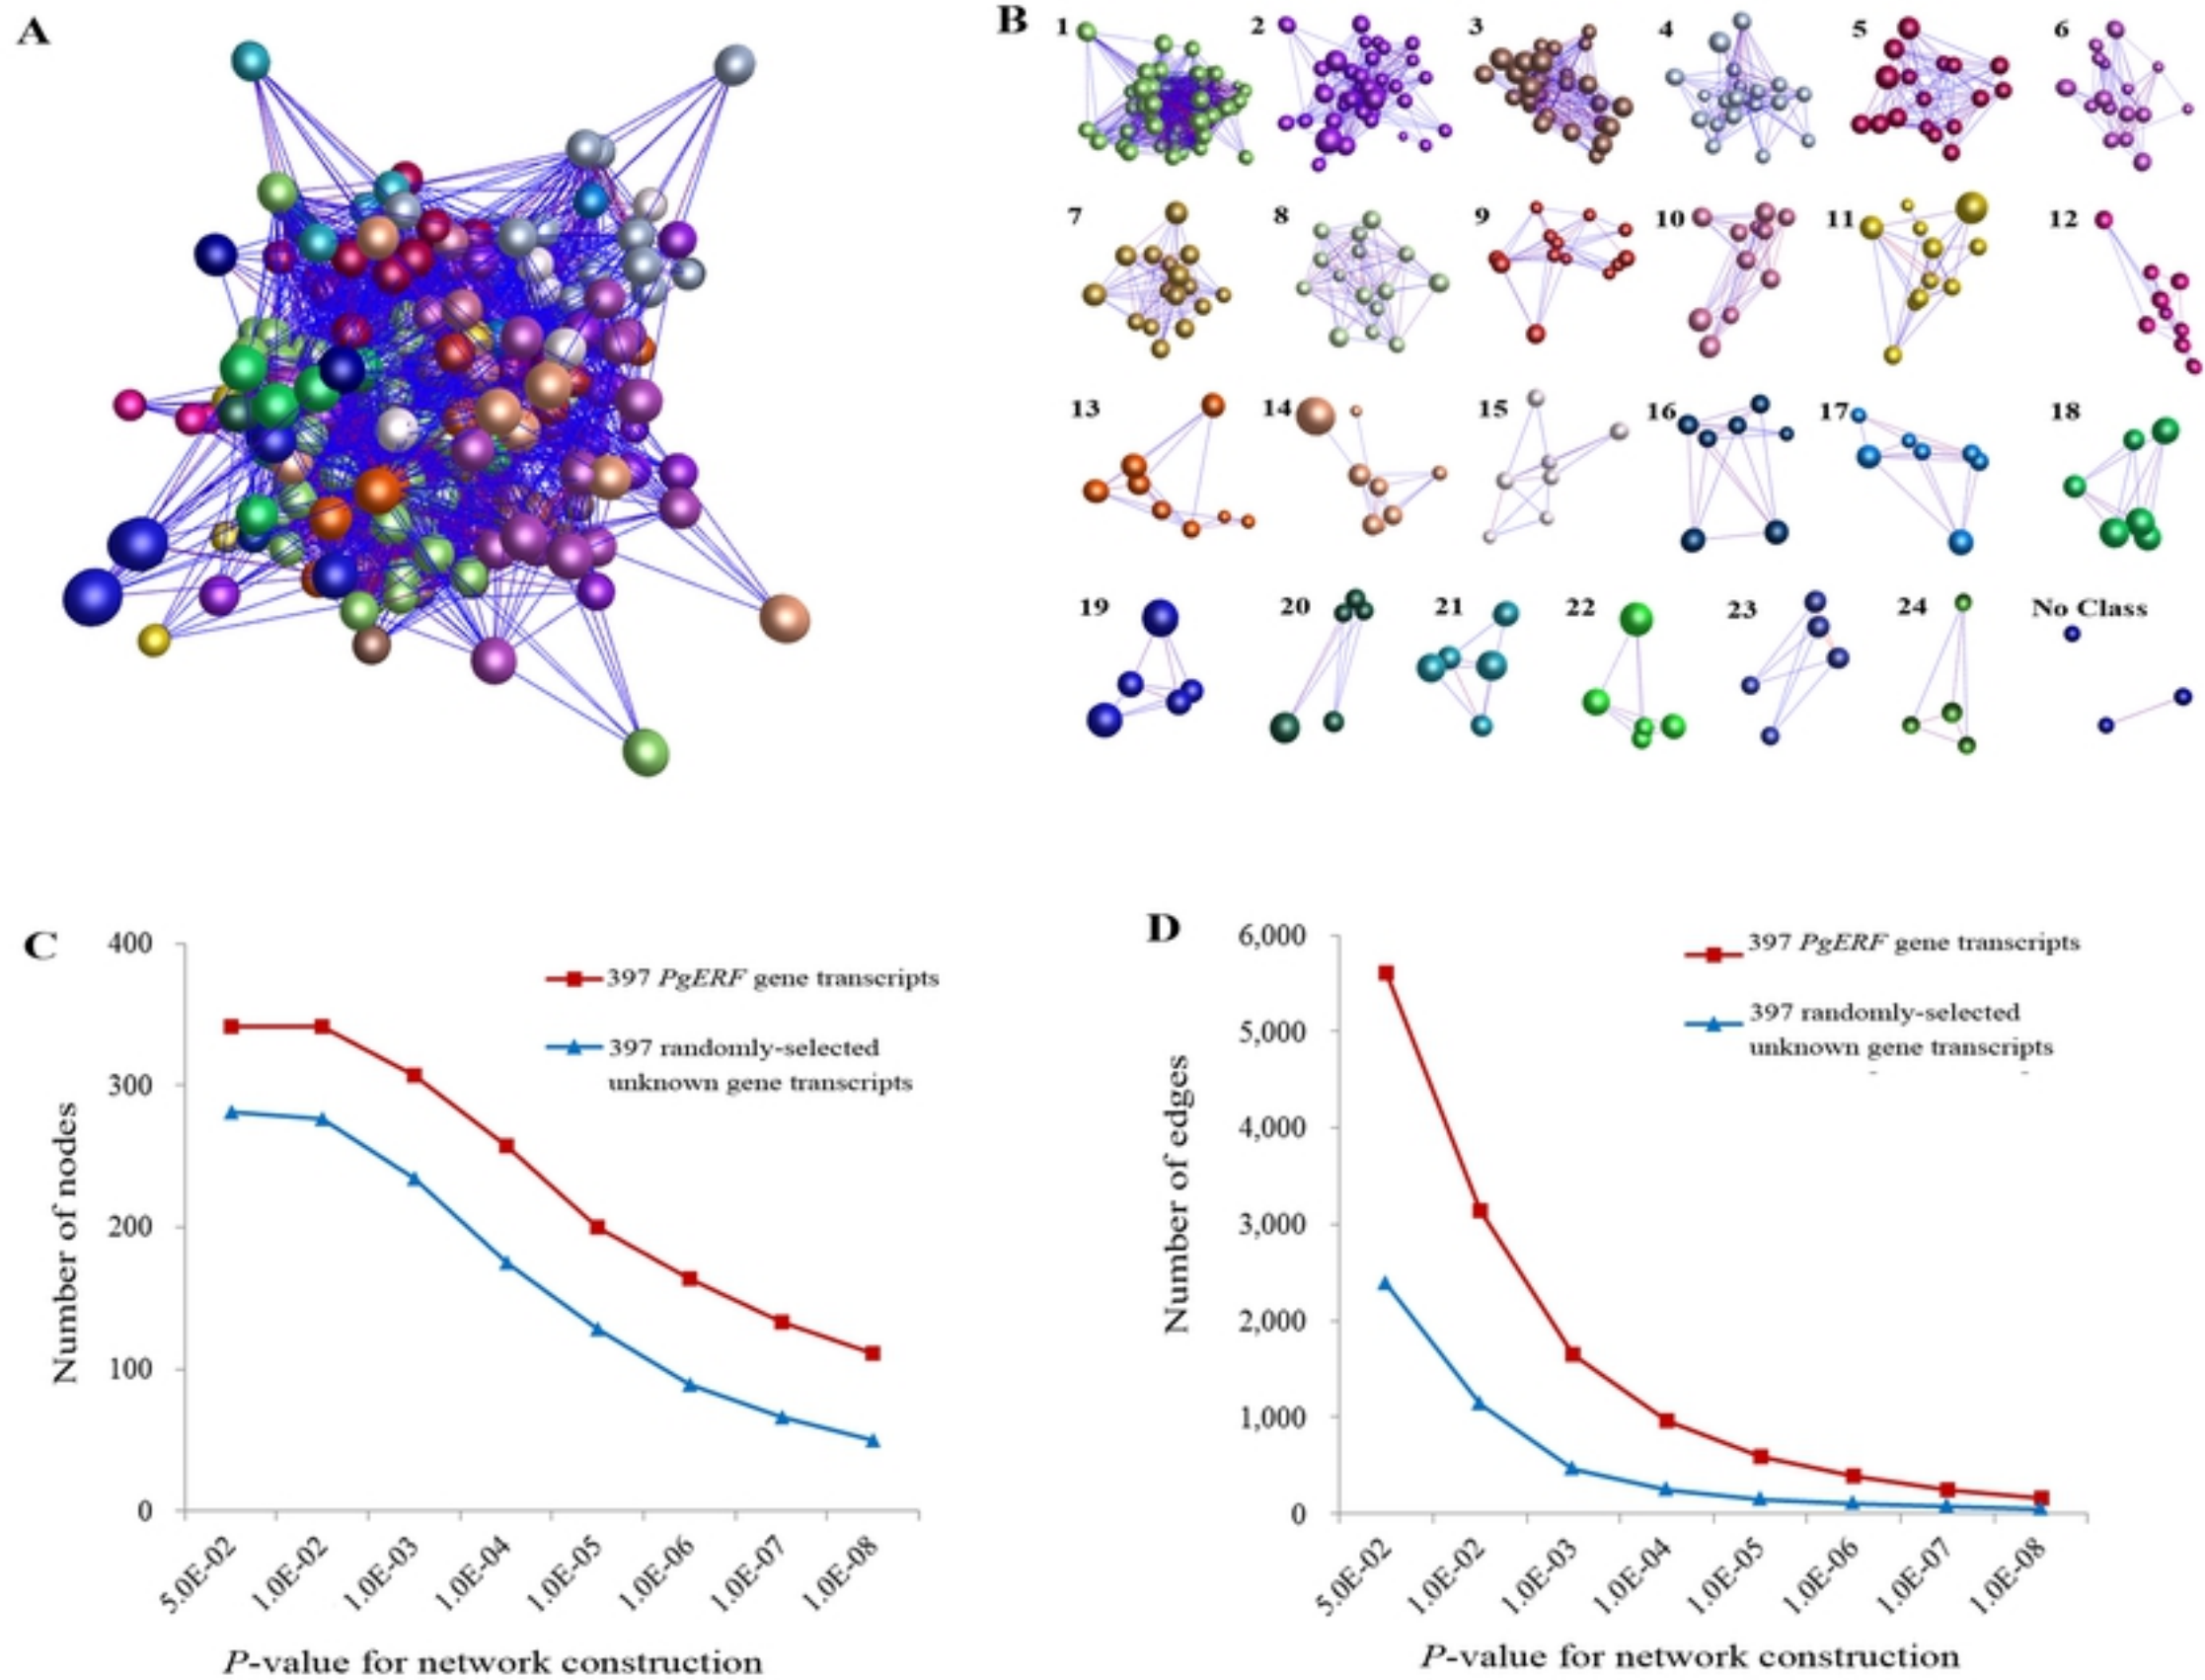

Figure 6

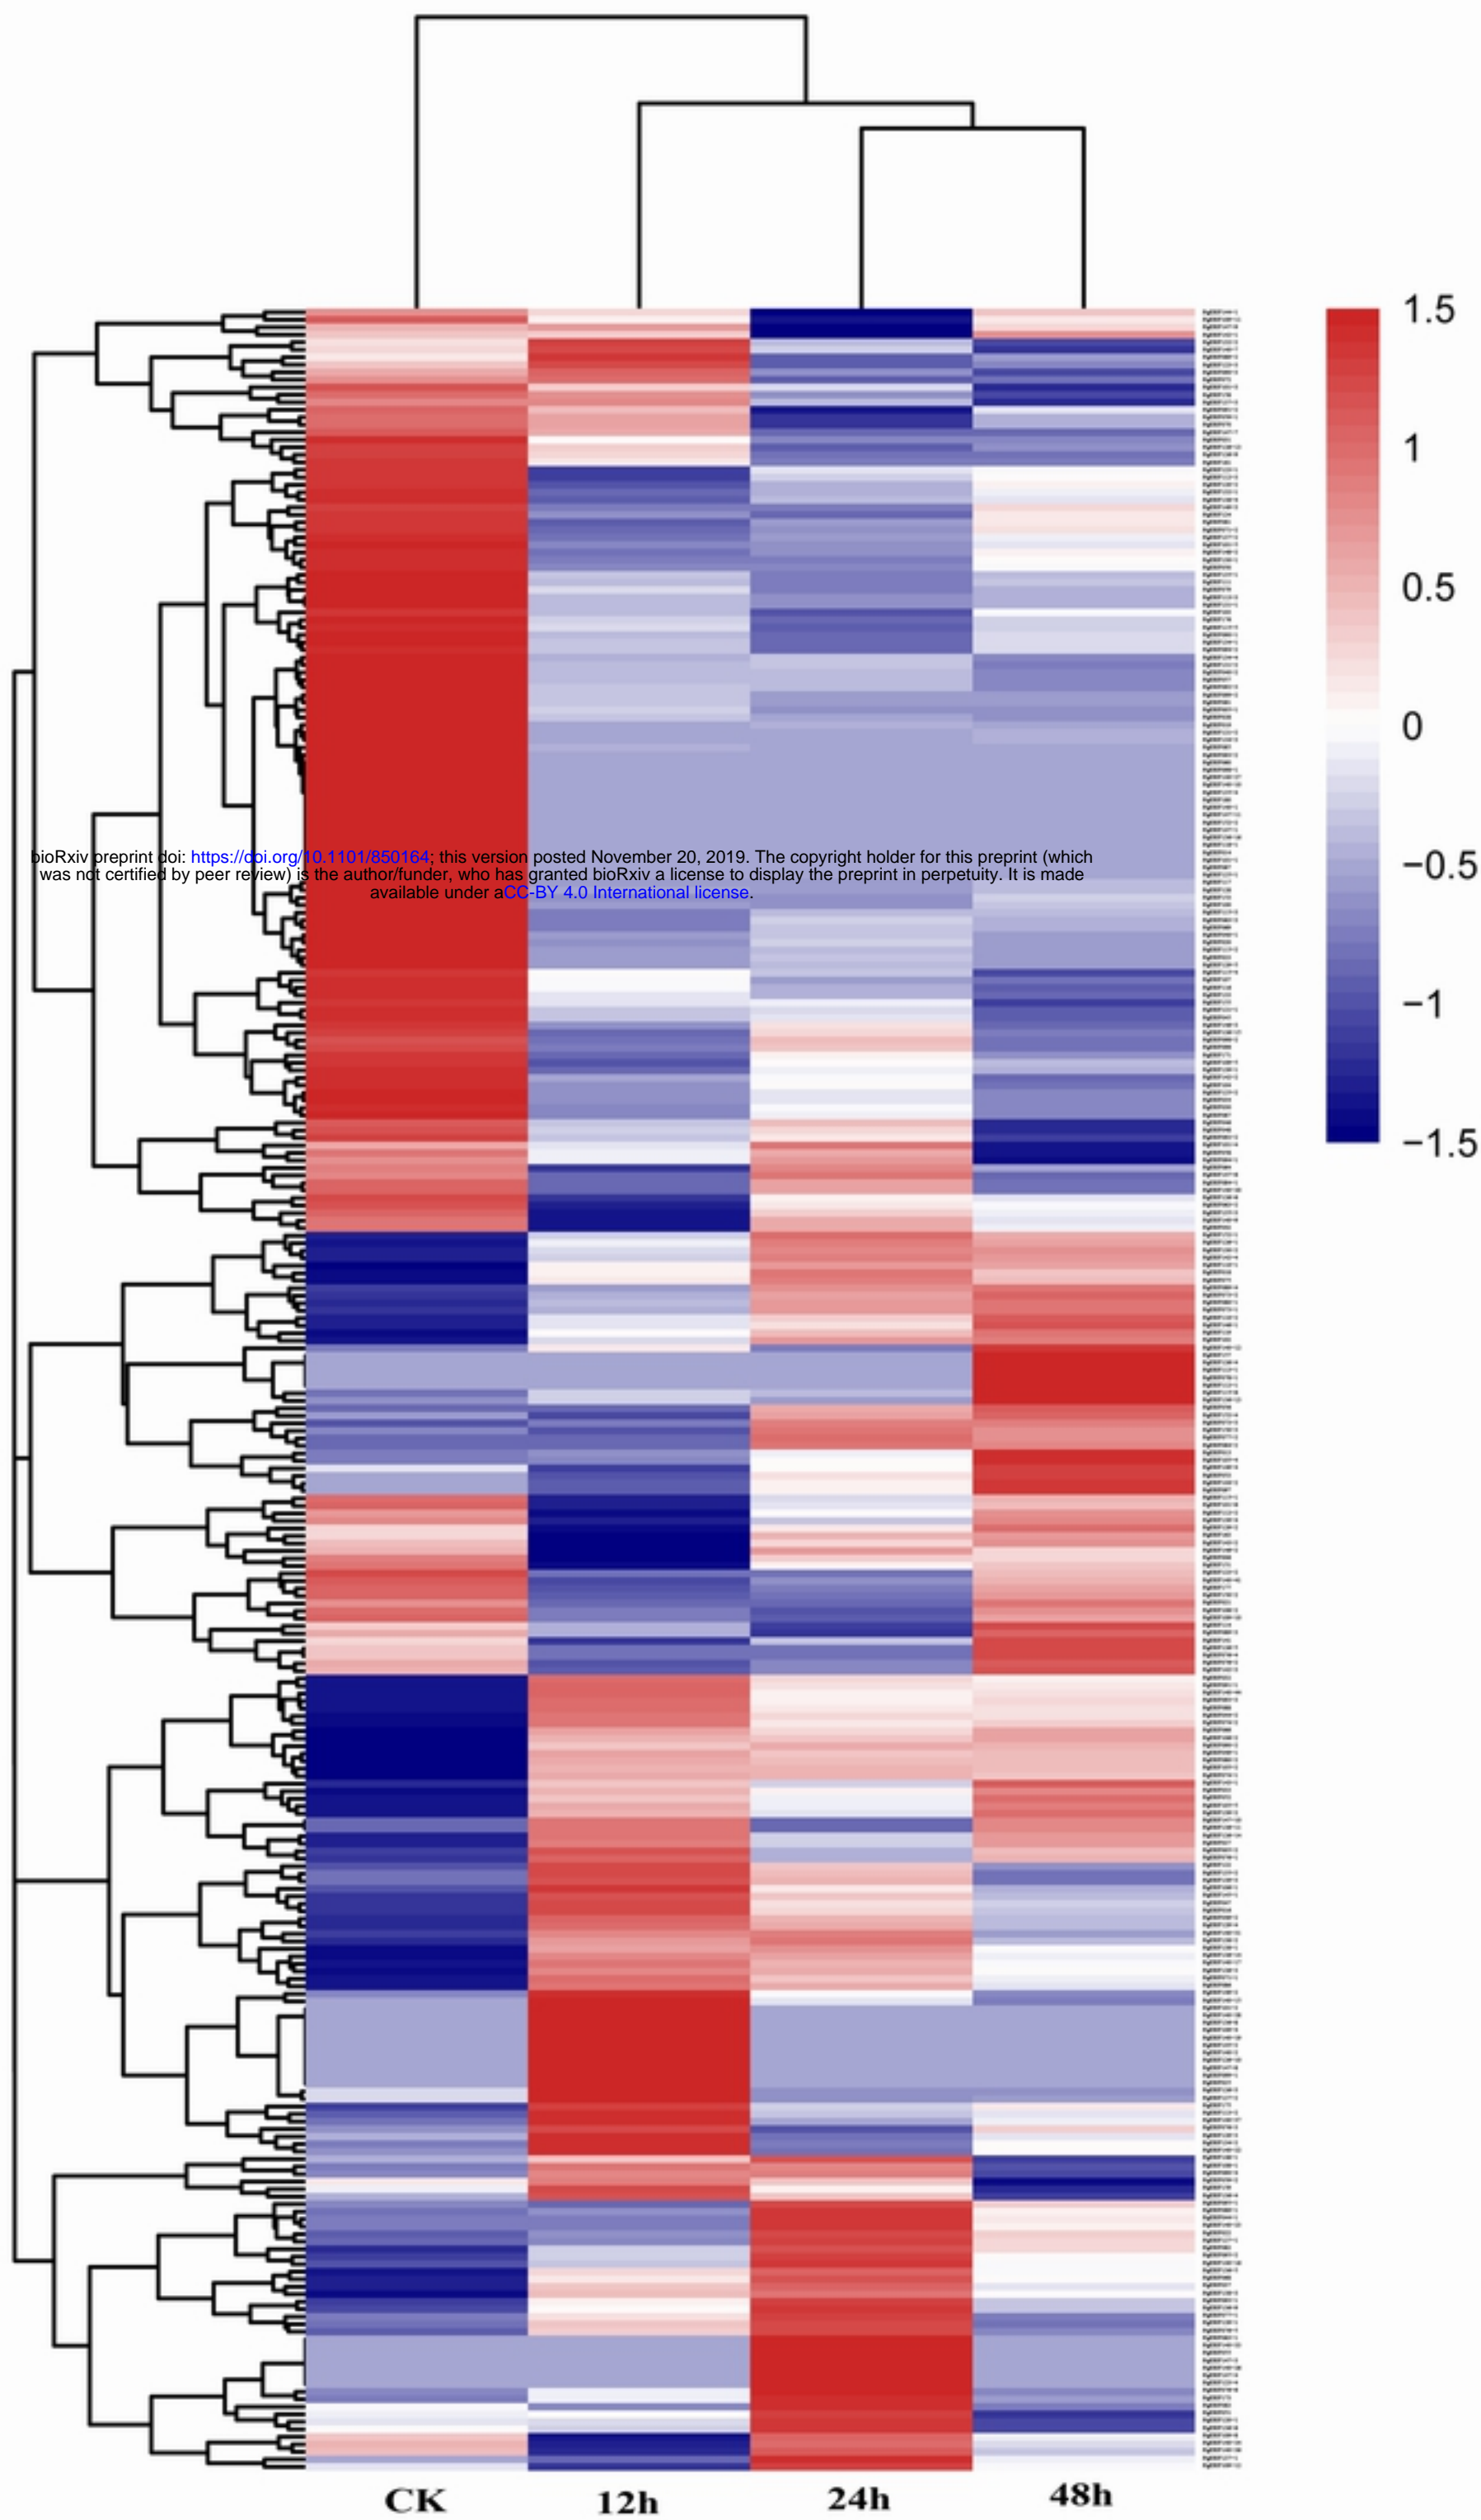

Figure 8
